# Supplementary material
Source: PubMed Central journal article supplement (PMC7261640)
Supplement: NIHMS1062726-supplement-Supplement_1.pdf [file NIHMS1062726-supplement-Supplement_1.pdf]

SUPPLEMENT 1

Use and reporting of Bland-Altman analyses in studies of self-reported vs measured weight and height

Katherine M. Flegal

Barry Graubard

John P.A. Ioannidis

Table S1: List of 394 studies that compare self-reported with measured height or weight

| First author (reference) | Title                                                                                                                                                              |
|--------------------------|--------------------------------------------------------------------------------------------------------------------------------------------------------------------|
| Aasvee (1)               | Validity of self-reported height and weight for estimating prevalence of overweight among Estonian adolescents: the Health Behaviour in School-aged Children study |
| Abalkhail (2)            | Validity of self-reported weight and height among Saudi school children and adolescents                                                                            |
| Abraham (3)              | Predictors of the accuracy of self-reported height and weight in adolescent female school students                                                                 |
| Acevedo (4)              | Body mass index through self-reported data and body image perception in Spanish adults attending dietary consultation                                              |
| Ahluwalia (5)            | Self-reported and clinical measurement of three chronic disease risks among low-income women in West Virginia                                                      |
| Akhtar-Danesh (6)        | Validity of self-reported height and weight for measuring prevalence of obesity                                                                                    |
| Ali (7)                  | Estimating the biases associated with self-perceived, self-reported, and measured BMI on mental health                                                             |
| Alvarez-Torices (8)      | Self-reported height and weight and prevalence of obesity. Study in a Spanish population                                                                           |
| Ambrosi-Randic (9)       | Self-reported versus measured weight and height by adolescent girls: a Croatian sample                                                                             |
| Ambwani (10)             | Weighing the Evidence: Social Desirability, Eating Disorder Symptomatology, and Accuracy of Self-reported Body Weight Among Men and Women                          |
| Anai (11)                | Determinant factors of the difference between self-reported weight and measured weight among Japanese                                                              |
| Andersen (12)            | Overweight and obesity among Norwegian schoolchildren: changes from 1993 to 2000                                                                                   |
| Araujo (13)              | Validity of self-reported weight, height, and BMI in mothers of the research Birth in Brazil                                                                       |
| Avila-Funes (14)         | Validity of height and weight self-report in Mexican adults: results from the national health and aging study                                                      |
| Babiarczyk (15)          | Accuracy of self-reported and measured anthropometric data in the inpatient population                                                                             |
| Bae (16)                 | Validity of self-reported height, weight, and body mass index of the Korea Youth Risk Behavior Web-based Survey questionnaire                                      |

|                    |                                                                                                                                                                                      |
|--------------------|--------------------------------------------------------------------------------------------------------------------------------------------------------------------------------------|
| Bannon (17)        | Comparison of Self-reported and Measured Pre-pregnancy Weight: Implications for Gestational Weight Gain Counseling                                                                   |
| Barcenas (18)      | Birthplace, years of residence in the United States, and obesity among Mexican-American adults                                                                                       |
| Barnes (19)        | Accuracy of self-reported weight and height and resulting body mass index among obese binge eaters in primary care: relationship with eating disorder and associated psychopathology |
| Bayomi (20)        | Ability and accuracy of long-term weight recall by elderly males: the Manitoba follow-up study                                                                                       |
| Beghin (21)        | Nutritional and pubertal status influences accuracy of self-reported weight and height in adolescents: the HELENA Study                                                              |
| Berg (22)          | Prevalence of overweight and obesity in children and adolescents in a county in Sweden                                                                                               |
| Bes-Rastrollo (23) | Validation of self-reported anthropometrics in the Adventist Health Study 2                                                                                                          |
| Betz (24)          | Gender differences in the accuracy of self-reported weight                                                                                                                           |
| Beyer (25)         | Observations of reported and measured heights of mothers of short statured children                                                                                                  |
| Bibiloni (26)      | Ten-year trends (2000-2010) in bias of self-reported weight, height and body mass index in a Mediterranean adult population                                                          |
| Birrell (27)       | Self-report overestimates true height loss: implications for diagnosis of osteoporosis                                                                                               |
| Black (28)         | Accuracy of self-reported body weight: Stepped Approach Model component assessment                                                                                                   |
| Blum (29)          | In patients we trust. Reliability of self-reported weight and size in patients attending a nuclear medicine department                                                               |
| Bolton-Smith (30)  | Accuracy of the estimated prevalence of obesity from self reported height and weight in an adult Scottish population.                                                                |
| Bonn (31)          | How valid are Web-based self-reports of weight?                                                                                                                                      |
| Booth (32)         | The relationship between body mass index and waist circumference: implications for estimates of the population prevalence of overweight                                              |
| Bostrom (33)       | Socioeconomic differentials in misclassification of height, weight and body mass index based on questionnaire data                                                                   |
| Bowden (34)        | Assessing the accuracy of self-reported height and weight in an elective surgical population in a Melbourne metropolitan hospital                                                    |
| Bowlin (35)        | Reliability and changes in validity of self-reported cardiovascular disease risk factors using dual response: the behavioral risk factor survey                                      |
| Bowlin (36)        | Validity of cardiovascular disease risk factors assessed by telephone survey: the Behavioral Risk Factor Survey                                                                      |
| Bowring (37)       | Measuring the accuracy of self-reported height and weight in a community-based sample of young people                                                                                |
| Braziuniene (38)   | Accuracy of self-reported height measurements in parents and its effect on mid-parental target height calculation                                                                    |

|                     |                                                                                                                                                                                                                                             |
|---------------------|---------------------------------------------------------------------------------------------------------------------------------------------------------------------------------------------------------------------------------------------|
| Brener (39)         | Reliability and validity of self-reported height and weight among high school students                                                                                                                                                      |
| Brestoff (40)       | Challenging the role of social norms regarding body weight as an explanation for weight, height, and BMI misreporting biases: development and application of a new approach to examining misreporting and misclassification bias in surveys |
| Brettschneider (41) | Updated prevalence rates of overweight and obesity in 11- to 17-year-old adolescents in Germany. Results from the telephone-based KiGGS Wave 1 after correction for bias in self-reports                                                    |
| Brettschneider (42) | Development and validation of correction formulas for self-reported height and weight to estimate BMI in adolescents. Results from the KiGGS study                                                                                          |
| Brettschneider (43) | Comparison of BMI derived from parent-reported height and weight with measured values: results from the German KiGGS study                                                                                                                  |
| Brettschneider (44) | Validity and predictors of BMI derived from self-reported height and weight among 11- to 17-year-old German adolescents from the KiGGS study                                                                                                |
| Bridges (45)        | Can self-reported height and weight be used to calculate 10 year risk of osteoporotic fracture?                                                                                                                                             |
| Briot (46)          | Accuracy of patient-reported height loss and risk factors for height loss among postmenopausal women                                                                                                                                        |
| Brooks-Gunn (47)    | Validity of self-report measures of girls' pubertal status                                                                                                                                                                                  |
| Brown (48)          | Is self-reported height or arm span a more accurate alternative measure of height?                                                                                                                                                          |
| Brug (49)           | Underestimation and overestimation of personal weight status: associations with socio-demographic characteristics and weight maintenance intentions                                                                                         |
| Brunner Huber (50)  | Validity of self-reported height and weight in women of reproductive age                                                                                                                                                                    |
| Burke (51)          | You can be too thin (but not too tall): Social desirability bias in self-reports of weight and height                                                                                                                                       |
| Burton (52)         | Accuracy of body mass index estimated from self-reported height and weight in mid-aged Australian women                                                                                                                                     |
| Butler (53)         | BMI calculation in older people: The effect of using direct and surrogate measures of height in a community-based setting                                                                                                                   |
| Buttenheim (54)     | Underestimation of adolescent obesity                                                                                                                                                                                                       |
| Cairns (55)         | Lifetime body size and reproductive factors: comparisons of data recorded prospectively with self reports in middle age                                                                                                                     |
| Carter (56)         | Self-reported health status, body mass index, and healthy lifestyle behaviors: differences between Baby Boomer and Generation X employees at a southeastern university                                                                      |
| Carvalho (57)       | Validation and calibration of self-reported weight and height from individuals in the city of Sao Paulo                                                                                                                                     |
| Casey (58)          | Long-term memory of body weight and past weight satisfaction: a longitudinal follow-up study                                                                                                                                                |
| Casey (59)          | Accuracy of recall by middle-aged participants in a longitudinal study of their body size and indices of maturation earlier in life                                                                                                         |

|                      |                                                                                                                                                                      |
|----------------------|----------------------------------------------------------------------------------------------------------------------------------------------------------------------|
| Cash (60)            | Are inaccuracies in self-reported weight motivated distortions?                                                                                                      |
| Castro (61)          | The role of answering behaviours on weight misreporting                                                                                                              |
| Cawley (62)          | Reporting error in weight and its implications for bias in economic models                                                                                           |
| Celis-Morales (63)   | How reliable is internet-based self-reported identity, socio-demographic and obesity measures in European adults?                                                    |
| Chang (64)           | Changes in the propensity of overweight US women to under-assess their body weight status                                                                            |
| Chang (65)           | Extent and determinants of discrepancy between self-evaluations of weight status and clinical standards                                                              |
| Chau (66)            | Self-reporting and measurement of body mass index in adolescents: refusals and validity, and the possible role of socioeconomic and health-related factors           |
| Chen (67)            | Association between obesity and high blood pressure: reporting bias related to gender and age                                                                        |
| Chernenko (68)       | Examining validity of body mass index calculated using height and weight data from the US driver license                                                             |
| Chiolero (69)        | Associations between obesity and health conditions may be overestimated if self-reported body mass index is used                                                     |
| Chor (70)            | Reliability of self-reported weight and height among state bank employees                                                                                            |
| Christian (71)       | Validity of self-reported weights following bariatric surgery                                                                                                        |
| Ciarapica (72)       | Validity of self-reported body weight and height among women including patients with eating disorders                                                                |
| Cizmecioğlu (73)     | Measured versus reported parental height                                                                                                                             |
| Clarke (74)          | Accuracy of self-reported versus measured weight over adolescence and young adulthood: findings from the national longitudinal study of adolescent health, 1996-2008 |
| Collett-Solberg (75) | Comparison between Actual and Perceived Height of Parents of Children with Short Stature and Controls                                                                |
| Conde (76)           | Consistency between anthropometric measures in national surveys                                                                                                      |
| Conley (77)          | Weight overestimation as an indicator of disordered eating behaviors among young women in the United States                                                          |
| Connor Gorber (78)   | The bias in self-reported obesity from 1976 to 2005: a Canada-US comparison                                                                                          |
| Connor Gorber (79)   | The feasibility of establishing correction factors to adjust self-reported estimates of obesity                                                                      |
| Corsenac (80)        | Overweight and obesity in New Caledonian adults: Results from measured and adjusted self-reported anthropometric data                                                |
| Courtemanche (81)    | Adjusting body mass for measurement error with invalid validation data                                                                                               |
| Craig (82)           | Accuracy of body mass index categories based on self-reported height and weight among women in the United States                                                     |
| Crawley (83)         | Self-reported versus measured height, weight and body mass index amongst 16-17 year old British teenagers                                                            |
| Cui (84)             | Prediction of Body Mass Index Using Concurrently Self-Reported or Previously Measured Height and Weight                                                              |

|                 |                                                                                                                                                                                                                                              |
|-----------------|----------------------------------------------------------------------------------------------------------------------------------------------------------------------------------------------------------------------------------------------|
| Cullum (85)     | Dietary restraint and the mis-reporting of anthropometric measures by middle-aged adults                                                                                                                                                     |
| Cuspidi (86)    | Self-reported weight and height: implications for left ventricular hypertrophy detection An Italian multi-center study                                                                                                                       |
| Dahl (87)       | Accuracy of recalled body weight--a study with 20-years of follow-up                                                                                                                                                                         |
| Dahl (88)       | Agreement between self-reported and measured height, weight and body mass index in old age--a longitudinal study with 20 years of follow-up                                                                                                  |
| Dalton (89)     | Self-reported versus actual weight and height data contribute to different weight misperception classifications                                                                                                                              |
| Daly (90)       | Using risk factor surveillance as a basis for mixed-methodology research: an example from Australia using food intake and anthropometric measures                                                                                            |
| Danubio (91)    | Comparison of self-reported and measured height and weight: implications for obesity research among young adults                                                                                                                             |
| Dauphinot (92)  | New obesity body mass index threshold for self-reported data                                                                                                                                                                                 |
| Davidson (93)   | Self-reported height, calculated height, and derived body mass index in assessment of older adults                                                                                                                                           |
| Davis (94)      | The weights and heights of Mexican-American adolescents: the accuracy of self-reports                                                                                                                                                        |
| De Vriendt (95) | Validity of self-reported weight and height of adolescents, its impact on classification into BMI-categories and the association with weighing behaviour                                                                                     |
| Dekkers (96)    | Accuracy of self-reported body weight, height and waist circumference in a Dutch overweight working population                                                                                                                               |
| DelPrete (97)   | Self-reported and measured weights and heights of participants in community-based weight loss programs                                                                                                                                       |
| Dhaliwal (98)   | Self-reported weight and height for evaluating obesity control programs                                                                                                                                                                      |
| Dijkshoorn (99) | Ethnic variation in validity of the estimated obesity prevalence using self-reported weight and height measurements                                                                                                                          |
| Doll (100)      | Heightened accuracy of self-reported weight in bulimia nervosa: a useful cognitive "distortion"                                                                                                                                              |
| Drake (101)     | Two-method measurement for adolescent obesity epidemiology: reducing the bias in self-report of height and weight                                                                                                                            |
| Drieskens (102) | Correction of self-reported BMI based on objective measurements: a Belgian experience                                                                                                                                                        |
| Duran (103)     | Can self-reported height and weight be used among people living with HIV/AIDS?                                                                                                                                                               |
| Dutton (104)    | The usefulness of "corrected" body mass index vs. self-reported body mass index: comparing the population distributions, sensitivity, specificity, and predictive utility of three correction equations using Canadian population-based data |
| Dzakpasu (105)  | Estimating bias in derived body mass index in the Maternity Experiences Survey                                                                                                                                                               |
| Ekstrom (106)   | Web-based self-reported height, weight, and body mass index among Swedish adolescents: a validation study                                                                                                                                    |

|                        |                                                                                                                                                                                |
|------------------------|--------------------------------------------------------------------------------------------------------------------------------------------------------------------------------|
| Elgar (107)            | Validity of self-report screening for overweight and obesity. Evidence from the Canadian Community Health Survey                                                               |
| Elgar (108)            | Validity of self-reported height and weight and predictors of bias in adolescents                                                                                              |
| Ellert (109)           | Applying a correction procedure to the prevalence estimates of overweight and obesity in the German part of the HBSC study                                                     |
| Ezzati (110)           | Trends in national and state-level obesity in the USA after correction for self-report bias: analysis of health surveys                                                        |
| Farre Rovira (111)     | Self-reported versus measured height, weight and body mass index in Spanish Mediterranean teenagers: effects of gender, age and weight on perceptual measures of body image    |
| Fernandez-Rhodes (112) | Accuracy of Self-reported Weight in Hispanic/Latino Adults of the Hispanic Community Health Study/Study of Latinos                                                             |
| Field (113)            | The validity of self-reported weight change among adolescents and young adults                                                                                                 |
| Fillenbaum (114)       | Accuracy of self-reported height and weight in a community-based sample of older African Americans and whites                                                                  |
| Finardi (115)          | Accuracy of self-reported weight in a high risk geriatric population in the emergency department                                                                               |
| Flood (116)            | Use of self-report to monitor overweight and obesity in populations: some issues for consideration                                                                             |
| Fonseca (117)          | Validity of BMI based on self-reported weight and height in adolescents                                                                                                        |
| Fortenberry (118)      | Reliability of adolescents' reports of height and weight                                                                                                                       |
| Frayon (119)           | Self-Reported Height and Weight in Oceanian School-Going Adolescents and Factors Associated with Errors                                                                        |
| Frid (120)             | Agreement between different methods of measuring height in elderly patients                                                                                                    |
| Gay (121)              | Give or take a few? Comparing measured and self-reported height and weight as correlates of social physique anxiety                                                            |
| Gebremariam (122)      | Are weight-related attitudes and behaviours associated with the accuracy of BMI derived from self-reported weight and height among 13-year-olds?                               |
| Geurden (123)          | Self-reported body weight and height on admission to hospital: a reliable method in multi-professional evidence-based nutritional care?                                        |
| Ghosh-Dastidar (124)   | Accuracy of BMI correction using multiple reports in children                                                                                                                  |
| Giacchi (125)          | Correction of the self-reported BMI in a teenage population                                                                                                                    |
| Gil (126)              | The determinants of misreporting weight and height: The role of social norms                                                                                                   |
| Gildner (127)          | Does BMI generated by self-reported height and weight measure up in older adults from middle-income countries? Results from the study on global AGEing and adult health (SAGE) |
| Giles (128)            | Stature- and age-related bias in self-reported stature                                                                                                                         |

|                      |                                                                                                                                                                                                      |
|----------------------|------------------------------------------------------------------------------------------------------------------------------------------------------------------------------------------------------|
| Gillum (129)         | Ethnic variation in validity of classification of overweight and obesity using self-reported weight and height in American women and men: the Third National Health and Nutrition Examination Survey |
| Gokler (130)         | The validity of self-reported vs. measured body weight and height and the effect of self-perception                                                                                                  |
| Goodman (131)        | Self-reported height and weight and the definition of obesity in epidemiological studies                                                                                                             |
| Goodman (132)        | Accuracy of teen and parental reports of obesity and body mass index                                                                                                                                 |
| Gozzi (133)          | Do centimetres matter? Self-reported versus estimated height measurements in parents                                                                                                                 |
| Griebeler (134)      | Self-reported versus measured height and weight in Hispanic and non-Hispanic menopausal women                                                                                                        |
| Grossschadl (135)    | Validity of self-reported weight and height in Austrian adults: sociodemographic determinants and consequences for the classification of BMI categories                                              |
| Gunnare (136)        | Accuracy of self-reported weight and role of gender, body mass index, weight satisfaction, weighing behavior, and physical activity among rural college students                                     |
| Gunnell (137)        | How accurately are height, weight and leg length reported by the elderly, and how closely are they related to measurements recorded in childhood?                                                    |
| Haapanen-Niemi (138) | Body mass index, physical inactivity and low level of physical fitness as determinants of all-cause and cardiovascular disease mortality--16 y follow-up of middle-aged and elderly men and women    |
| Han (139)            | Validity of Self-Reported Pre-Pregnancy Weight and Body Mass Index Classification in an Integrated Health Care Delivery System                                                                       |
| Harvey-Berino (140)  | The accuracy of weight reported in a web-based obesity treatment program                                                                                                                             |
| Hattori (141)        | The obesity epidemic and changes in self-report biases in BMI                                                                                                                                        |
| Hauck (142)          | Inaccuracy of self-reported weights and heights among American Indian adolescents                                                                                                                    |
| Haverkort (143)      | Self-reporting of height and weight: valid and reliable identification of malnutrition in preoperative patients                                                                                      |
| Hayes (144)          | Change in bias in self-reported body mass index in Australia between 1995 and 2008 and the evaluation of correction equations                                                                        |
| Hayes (145)          | Estimating equations to correct self-reported height and weight: implications for prevalence of overweight and obesity in Australia                                                                  |
| Heaney (146)         | Relation between measured and recalled body height                                                                                                                                                   |
| Hendershot (147)     | Estimated height, weight, and body mass index: implications for research and patient safety                                                                                                          |
| Hernan (148)         | Recruitment into diabetes prevention programs: what is the impact of errors in self-reported measures of obesity?                                                                                    |
| Hill (149)           | Body mass index: a comparison between self-reported and measured height and weight                                                                                                                   |
| Himes (150)          | Factors associated with errors in self-reports of stature, weight, and body mass index in Minnesota adolescents                                                                                      |
| Himes (151)          | Validity and reliability of self-reported stature and weight of US adolescents                                                                                                                       |

|                   |                                                                                                                                                                                                                        |
|-------------------|------------------------------------------------------------------------------------------------------------------------------------------------------------------------------------------------------------------------|
| Himes (152)       | Validity of self-reported weight and stature of American Indian youth                                                                                                                                                  |
| Hodgson (153)     | Body mass index: a comparison between self-reported and measured height and weight                                                                                                                                     |
| Holland (154)     | Self-reported pre-pregnancy weight versus weight measured at first prenatal visit: effects on categorization of pre-pregnancy body mass index                                                                          |
| Hongjun (155)     | Regression Models to Predict Corrected Height, Weight, and Obesity Indicators among University Students in Beijing, China                                                                                              |
| Hsiao (156)       | Comparison of measured and self-reported anthropometric information among firefighters: implications and applications                                                                                                  |
| Hussain (157)     | Computer-administered screening of reproductive-aged women for diabetes risk in primary care settings, feasibility and acceptability of such screening, and validity of risk assessments based on self-reported weight |
| Hussey (158)      | The reliability of in-home measures of height and weight in large cohort studies: Evidence from Add Health                                                                                                             |
| Ikeda (159)       | Validity of Self-Reports of Height and Weight among the General Adult Population in Japan: Findings from National Household Surveys, 1986                                                                              |
| Imrhan (160)      | Can self-estimates of body weight and height be used in place of measurements for college students?                                                                                                                    |
| Isidoro (161)     | Validation of obesity based on self-reported data in Spanish women participants in breast cancer screening programmes                                                                                                  |
| Jacobson (162)    | Comparison of Body Mass Index by self-reported versus measured height and weight                                                                                                                                       |
| Jain (163)        | Regression models to predict corrected weight, height and obesity prevalence from self-reported data: data from BRFSS 1999-2007                                                                                        |
| Jalkanen (164)    | Accuracy of self-reported body weight compared to measured body weight A population survey                                                                                                                             |
| Jansen (165)      | Differences in measured and self-reported height and weight in Dutch adolescents                                                                                                                                       |
| Jayawardene (166) | Discrepant body mass index: behaviors associated with height and weight misreporting among US adolescents from the National Youth Physical Activity and Nutrition Study                                                |
| Jeffery (167)     | Does clinical depression affect the accuracy of self-reported height and weight in obese women?                                                                                                                        |
| Jeffery (168)     | Bias in reported body weight as a function of education, occupation, health and weight concern                                                                                                                         |
| Jeffs (169)       | Weight and height measurement: potential impact in obstetric care                                                                                                                                                      |
| Jenkins (170)     | Accuracy of Self-Reported Weight Among Adolescent and Young Adults Following Bariatric Surgery                                                                                                                         |
| Jenkins (171)     | Validation of a weight history questionnaire to identify adolescent obesity                                                                                                                                            |
| Jerome (172)      | Longitudinal accuracy of web-based self-reported weights: results from the Hopkins POWER Trial                                                                                                                         |
| John (173)        | Validity of overweight and obesity in a nation based on self-report versus measurement device data                                                                                                                     |
| Johnson (174)     | Ethnic differences in self-reported and measured obesity                                                                                                                                                               |
| Katsnelson (175)  | Self-reported vs measured body mass indices in migraineurs                                                                                                                                                             |



|                       |                                                                                                                                                                                   |
|-----------------------|-----------------------------------------------------------------------------------------------------------------------------------------------------------------------------------|
| Kawada (176)          | Validation study on self-reported height, weight, and blood pressure                                                                                                              |
| Kee (177)             | Validity of self-reported weight and height: a cross-sectional study among Malaysian adolescents                                                                                  |
| Keith (178)           | Use of self-reported height and weight biases the body mass index-mortality association                                                                                           |
| Kinney (179)          | Accuracy of self-reported weight in a non-normal population                                                                                                                       |
| Kintziou (180)        | Validity of Self-Reported Body Mass, Height, and Body Mass Index in Female Students: The Role of Physical Activity Level, Menstrual Cycle Phase, and Time of Day                  |
| Klag (181)            | Validity of physicians' self-reports of cardiovascular disease risk factors                                                                                                       |
| Knechtle (182)        | Estimation bias: body mass and body height in endurance athletes                                                                                                                  |
| Konstantynowicz (183) | Some remarks on self-reported and measured height and weight in adolescents                                                                                                       |
| Kovalchik (184)       | Validity of adult lifetime self-reported body weight                                                                                                                              |
| Krakowiak (185)       | Maternal Recall Versus Medical Records of Metabolic Conditions from the Prenatal Period: A Validation Study                                                                       |
| Krul (186)            | Self-reported and measured weight, height and body mass index (BMI) in Italy, the Netherlands and North America                                                                   |
| Kuczmarski (187)      | Effects of age on validity of self-reported height, weight, and body mass index: findings from the Third National Health and Nutrition Examination Survey, 1988-1994              |
| Kuriyama (188)        | Medical care expenditure associated with body mass index in Japan: the Ohsaki Study                                                                                               |
| Kurth (189)           | Estimated and measured BMI and self-perceived body image of adolescents in Germany: part 1 - general implications for correcting prevalence estimations of overweight and obesity |
| Kuskowska-Wolk (190)  | Self-reported weight and height considerably affect the weight distribution of a population                                                                                       |
| Kuskowska-Wolk (191)  | Relationship between questionnaire data and medical records of height, weight and body mass index                                                                                 |
| Kuskowska-Wolk (192)  | Influence of body image on estimation of body mass index based on self-reported weight and height                                                                                 |
| Kuskowska-Wolk (193)  | The "true" prevalence of obesity. A comparison of objective weight and height measures versus self-reported and calibrated data                                                   |
| Kuskowska-Wolk (194)  | The predictive validity of body mass index based on self-reported weight and height                                                                                               |
| Kyulo (195)           | Validation of recall of body weight over a 26-year period in cohort members of the Adventist Health Study 2                                                                       |
| Lackland (196)        | The need for accurate nutrition survey methodology: the South Carolina experience                                                                                                 |
| Larsen (197)          | Validity of self-reported weight and height and predictors of weight bias in female college students                                                                              |
| Larson (198)          | Social desirability and self-reported weight and height                                                                                                                           |
| Lassale (199)         | Validity of web-based self-reported weight and height: results of the Nutrinet-Sante study                                                                                        |
| Lawlor (200)          | Agreement between measured and self-reported weight in older women. Results from the British Women's Heart and Health Study                                                       |

|                   |                                                                                                                                                                                                          |
|-------------------|----------------------------------------------------------------------------------------------------------------------------------------------------------------------------------------------------------|
| Le Marchand (201) | Validation of body size information on driver's licenses                                                                                                                                                 |
| Leatherdale (202) | Reliability and validity of the weight status and dietary intake measures in the COMPASS questionnaire: are the self-reported measures of body mass index (BMI) and Canada's food guide servings robust? |
| Lee (203)         | Validity of self-reported height and weight in a Korean population                                                                                                                                       |
| Lee (204)         | Self-assessment of height, weight, and sexual maturation: validity in overweight children and adolescents                                                                                                |
| Lee (205)         | Validity of self-reported weight and height: comparison between immigrant and non-immigrant Mexican Americans in NHANES III                                                                              |
| Legleye (206)     | Correction of body-mass index using body-shape perception and socioeconomic status in adolescent self-report surveys                                                                                     |
| LeJarraga (207)   | Validity of reported parental height in outpatient growth clinics in Buenos Aires city                                                                                                                   |
| Leone (208)       | Validation of Self-Reported Anthropometrics in Female College Freshmen                                                                                                                                   |
| Liechty (209)     | Feasibility and validity of a statistical adjustment to reduce self-report bias of height and weight in wave 1 of the Add Health study                                                                   |
| Lim (210)         | Validity of self-reported weight, height, and body mass index among university students in Thailand: Implications for population studies of obesity in developing countries                              |
| Lim (211)         | University of Hawai'i Cancer Center Connection: bias in self-reported anthropometry in relation to adiposity and adulthood weight gain among postmenopausal Caucasian and Japanese American Women        |
| Lin (212)         | Accuracy and reliability of self-reported weight and height in the Sister Study                                                                                                                          |
| Linder(213)       | The epidemiology of weight perception: perceived versus self-reported actual weight status among Albertan adults                                                                                         |
| Linhart (214)     | Validity of self-reported weight and height among 13-14 year old schoolchildren in Israel                                                                                                                |
| Lipsky (215)      | Accuracy of Self-Reported Height, Weight, and BMI Over Time in Emerging Adults                                                                                                                           |
| Ljungvall (216)   | Misreporting and misclassification: implications for socioeconomic disparities in body-mass index and obesity                                                                                            |
| Lois (217)        | Can self-reported height and weight be relied upon?                                                                                                                                                      |
| Lopuszanska (218) | Self-reported versus measured body height and weight in Polish adult men: the risk of underestimating obesity rates                                                                                      |
| Lu (219)          | Accuracy of self-reported height, weight, and waist circumference in a general adult Chinese population                                                                                                  |
| Lucca (220)       | Validity and reliability of self-reported weight, height and body mass index from telephone interviews                                                                                                   |
| Luo (221)         | Accuracy of self-reported weight in the Women's Health Initiative                                                                                                                                        |
| Lyons (222)       | Food insecurity and obesity: a comparison of self-reported and measured height and weight                                                                                                                |
| Macgregor (223)   | Bias, precision and heritability of self-reported and clinically measured height in Australian twins                                                                                                     |
| MacLellan (224)   | Measured weights in PEI adults reveal higher than expected obesity rates                                                                                                                                 |

|                 |                                                                                                                                                 |
|-----------------|-------------------------------------------------------------------------------------------------------------------------------------------------|
| Madden (225)    | Adjusting the obesity thresholds for self-reported BMI in Ireland: a cross-sectional analysis                                                   |
| Magnusson (226) | The validity of self-reported body mass index in a population-based osteoarthritis study                                                        |
| Mai (227)       | Inaccurate self-report of height and its impact on misclassification of body mass index in postmenopausal women                                 |
| Mandujano (228) | Women's reported weight: is there a discrepancy?                                                                                                |
| Martin (229)    | Validity of Self-Reported Physical Fitness and Body Mass Index in a Military Population                                                         |
| Martins (230)   | Use of self-reported measures of height, weight and body mass index in a rural population of Northeast Brazil                                   |
| Masheb (231)    | Accuracy of self-reported weight in patients with binge eating disorder                                                                         |
| Maupin (232)    | Assessing the accuracy of two proxy measures for BMI in a semi-rural, low-resource setting in Guatemala                                         |
| May (233)       | Prediction of measured weight from self-reported weight was not improved after stratification by body mass index                                |
| McAdams (234)   | Comparison of self-reported and measured BMI as correlates of disease markers in US adults                                                      |
| McCabe (235)    | Eating disorders, dieting, and the accuracy of self-reported weight                                                                             |
| Meng (236)      | Self-reported versus measured height and weight in the health and retirement study                                                              |
| Merrill (237)   | Validity of self-reported height, weight, and body mass index: findings from the National Health and Nutrition Examination Survey, 2001-2006    |
| Meyer (238)     | Accuracy of self-reported weight and height among women with eating disorders: a replication and extension study                                |
| Meyer (239)     | Accuracy of self-reported weight and height: relationship with eating psychopathology among young women                                         |
| Millar (240)    | Distribution of body weight and height: comparison of estimates based on self-reported and observed measures                                    |
| Moreira (241)   | Self-reported weight and height are valid measures to determine weight status: results from the Brazilian National Health Survey (PNS 2013)     |
| Morgan (242)    | Restraint, weight suppression, and self-report reliability: how much do you really weigh?                                                       |
| Morrissey (243) | Comparison of self-reported and measured height and weight in eighth-grade students                                                             |
| Mozumdar (244)  | Corrective Equations to Self-Reported Height and Weight for Obesity Estimates Among U.S. Adults: NHANES 1999-2008                               |
| Mozumdar (245)  | Correction equations to adjust self-reported height and weight for obesity estimates among college students                                     |
| Mueller (246)   | Self-perceived vs actual and desired weight and body mass index in adult ambulatory general internal medicine patients: a cross sectional study |
| Munoz (247)     | Recall of body weight and body size estimation in women enrolled in the breast cancer detection and demonstration project (BCDDP)               |
| Murphy (248)    | Self-reported health parameters compared with clinician measurements: methods in practice-based research                                        |

|                    |                                                                                                                                                        |
|--------------------|--------------------------------------------------------------------------------------------------------------------------------------------------------|
| Murray (249)       | A comparison between Atlantic Canadian and national correction equations to improve the accuracy of self-reported obesity estimates in Atlantic Canada |
| Must (250)         | Remote recall of childhood height, weight, and body build by elderly subjects                                                                          |
| Nakamura (251)     | Reliability of self-reported body height and weight of adult Japanese women                                                                            |
| Natamba (252)      | Concordance between self-reported pre-pregnancy body mass index (BMI) and BMI measured at the first prenatal study contact                             |
| Nawaz (253)        | Self-reported weight and height: implications for obesity research                                                                                     |
| Neermark (254)     | Validation and calibration of self-reported height and weight in the Danish Health Examination Survey                                                  |
| Ng (255)           | Validity of self-reported height and weight and derived body mass index in middle-aged and elderly individuals in Australia                            |
| Ng (256)           | Biases in self-reported height and weight measurements and their effects on modeling health outcomes                                                   |
| Niedhammer (257)   | Validity of self-reported weight and height in the French GAZEL cohort                                                                                 |
| Niedzwiedzka (258) | Validity of self-reported height and weight in elderly Poles                                                                                           |
| Nieto-Garcia (259) | Body mass definitions of obesity: sensitivity and specificity using self-reported weight and height                                                    |
| Nikolaou (260)     | Weight changes in young adults: a mixed-methods study                                                                                                  |
| Nikolaou (261)     | Accuracy of on-line self-reported weights and heights by young adults                                                                                  |
| Norgan (262)       | The accuracy of body weight and height recall in middle-aged men                                                                                       |
| Nyholm (263)       | What is the accurate prevalence of obesity in Sweden in the 21st century? Methodological experiences from the skaraborg project                        |
| Nyholm (264)       | The validity of obesity based on self-reported weight and height: Implications for population studies                                                  |
| O'Connell (265)    | Measured and reported weight change for women using a vaginal contraceptive ring vs. a low-dose oral contraceptive                                     |
| Ohlmer (266)       | Diagnosing underweight in adolescent girls: should we rely on self-reported height and weight?                                                         |
| Okamoto (267)      | Accuracy of self-reported height, weight and waist circumference in a Japanese sample                                                                  |
| Okosun (268)       | Self-reported and measured height and weight: impact on racial/ethnic differences in hypertension                                                      |
| Olfert (269)       | Self-Reported vs. Measured Height, Weight, and BMI in Young Adults                                                                                     |
| Olivarius (270)    | Accuracy of 1-, 5- and 10-year body weight recall given in a standard questionnaire                                                                    |
| Oliveira (271)     | Self-reporting weight and height: misclassification effect on the risk estimates for acute myocardial infarction                                       |
| Opichka (272)      | Accuracy of self-reported heights and weights in a predominately low-income, diverse population living in the USA                                      |
| Ortiz-Panozo (273) | Validity of self-reported anthropometry in adult Mexican women                                                                                         |

|                         |                                                                                                                                                                                      |
|-------------------------|--------------------------------------------------------------------------------------------------------------------------------------------------------------------------------------|
| Ossiander (274)         | Driver's licenses as a source of data on height and weight                                                                                                                           |
| Oud (275)               | Reporting the methodology of height and weight acquisition in studies of body mass index-based prognosis in critically ill patients                                                  |
| Paez (276)              | Validation of self-reported weights and heights in the avoiding diabetes after pregnancy trial (ADAPT)                                                                               |
| Page (277)              | Assessing prevalence of overweight and obesity through self-reports of height and weight by high school students in Taipei, Taiwan                                                   |
| Paradis (278)           | Validity of a self-reported measure of familial history of obesity                                                                                                                   |
| Park (279)              | Self-reported and measured anthropometric data and risk of colorectal cancer in the EPIC-Norfolk study                                                                               |
| Park (280)              | Effects of body size and sociodemographic characteristics on differences between self-reported and measured anthropometric data in middle-aged men and women: the EPIC-Norfolk study |
| Pasalich (281)          | Accuracy of self-reported anthropometric measures in older Australian adults                                                                                                         |
| Payette (282)           | Validity of self-reported height and weight estimates in cognitively-intact and impaired elderly individuals                                                                         |
| Perez (283)             | Measuring the bias, precision, accuracy, and validity of self-reported height and weight in assessing overweight and obesity status among adolescents using a surveillance system    |
| Perez-Cueto (284)       | Reliability and validity of self-reported weight and height in Belgium                                                                                                               |
| Perry (285)             | The validity of self-reports of past body weights by U.S. adults                                                                                                                     |
| Pfohl (286)             | Body weight and reported versus measured weight loss as confounders of the dexamethasone suppression test                                                                            |
| Phimphasone-Brady (287) | Self-report versus objective measurement of weight history: implications for pre-treatment weight gain                                                                               |
| Ploubidis (288)         | Health measurement in population surveys: combining information from self-reported and observer-measured health indicators                                                           |
| Poston (289)            | Accuracy of self-reported weight, height and BMI in US firefighters                                                                                                                  |
| Powell-Young (290)      | The validity of self-report weight and height as a surrogate method for direct measurement                                                                                           |
| Power (291)             | A Comparison of Perceived and Measured Paternal Weight and BMI, and Relationship to Weight and BMI of his Children                                                                   |
| Preston (292)           | Effects of categorization and self-report bias on estimates of the association between obesity and mortality                                                                         |
| Pronk (293)             | The Use of Telehealth Technology in Assessing the Accuracy of Self-Reported Weight and the Impact of a Daily Immediate-Feedback Intervention among Obese Employees                   |
| Puig (294)              | Self-reported and measured overweight and weight-control practices of adolescents living in a Mediterranean city of Spain                                                            |
| Pursey (295)            | How accurate is web-based self-reported height, weight, and body mass index in young adults?                                                                                         |

|                  |                                                                                                                                                            |
|------------------|------------------------------------------------------------------------------------------------------------------------------------------------------------|
| Qin (296)        | Validity of self-reported weight, height, and body mass index among African American breast cancer survivors                                               |
| Quick (297)      | Concordance of self-report and measured height and weight of college students                                                                              |
| Ramos (298)      | Unawareness of weight and height--the effect on self-reported prevalence of overweight in a population-based study                                         |
| Rasmussen (299)  | Bias in height and weight reported by Swedish adolescents and relations to body dissatisfaction: the COMPASS study                                         |
| Rasmussen (300)  | Validity of self-reported height and weight among adolescents: the importance of reporting capability                                                      |
| Reidlinger (301) | Resting metabolic rate and anthropometry in older people: a comparison of measured and calculated values                                                   |
| Reidpath (302)   | Validity of self-measured waist and hip circumferences: results from a community study in Malaysia                                                         |
| Rhew (303)       | Measurement matters in the association between early adolescent depressive symptoms and body mass index                                                    |
| Richmond (304)   | Racial/ethnic differences in accuracy of body mass index reporting in a diverse cohort of young adults                                                     |
| Richmond (305)   | Sexual orientation and bias in self-reported BMI                                                                                                           |
| Rimm (306)       | Validity of self-reported waist and hip circumferences in men and women                                                                                    |
| Roberts (307)    | Can self-reported data accurately describe the prevalence of overweight?                                                                                   |
| Rona (308)       | The validity of reported parental height in inner city areas in England                                                                                    |
| Rosella (309)    | The influence of measurement error on calibration, discrimination, and overall estimation of a risk prediction model                                       |
| Rosenman (310)   | Measuring bias in self-reported data                                                                                                                       |
| Rossouw (311)    | The accuracy of self-reported weight by overweight and obese women in an outpatient setting                                                                |
| Roth (312)       | The correlation between self-reported and measured height, weight, and BMI in reproductive age women                                                       |
| Rousseau (313)   | Comparison of self-reported height and weight by cancer type among men from Montreal, Canada                                                               |
| Rowland (314)    | Self-reported weight and height                                                                                                                            |
| Sagna (315)      | Adjusting divergences between self-reported and measured height and weight in an adult Canadian population                                                 |
| Sahyoun (316)    | Factors associated with errors in self-reported height and weight in older adults                                                                          |
| Santillan (317)  | Body mass index and asthma among Mexican adults: the effect of using self-reported vs measured weight and height                                           |
| Sayegh (318)     | Self-reported height in postmenopausal women: precise is nice, and sometimes necessary                                                                     |
| Schenker (319)   | Improving on analyses of self-reported data in a large-scale health survey by using information from an examination-based survey                           |
| Schieve (320)    | Validity of self-reported pregnancy delivery weight: an analysis of the 1988 National Maternal and Infant Health Survey. NMIHS Collaborative Working Group |

|                 |                                                                                                                                                                  |
|-----------------|------------------------------------------------------------------------------------------------------------------------------------------------------------------|
| Schmidt (321)   | Validity of self-reported weight--a study of urban Brazilian adults                                                                                              |
| Scribani (322)  | Comparison of bias resulting from two methods of self-reporting height and weight: a validation study                                                            |
| Sgro (323)      | The validity of self-reported height and weight is questioned                                                                                                    |
| Shapiro (324)   | The effects of restraint, gender, and body mass index on the accuracy of self-reported weight                                                                    |
| Sharples (325)  | Agreement between measured and self-reported height, weight and BMI in predominantly European middle-aged New Zealanders: findings from a nationwide 1989 survey |
| Shields (326)   | Bias in self-reported estimates of obesity in Canadian health surveys: an update on correction equations for adults                                              |
| Shields (327)   | Effects of measurement on obesity and morbidity                                                                                                                  |
| Shields (328)   | Estimates of obesity based on self-report versus direct measures                                                                                                 |
| Shiely (329)    | Height and weight bias: the influence of time                                                                                                                    |
| Shiely (330)    | Temporal trends in misclassification patterns of measured and self-report based body mass index categories--findings from three population surveys in Ireland    |
| Shin (331)      | Validity of prepregnancy weight status estimated from self-reported height and weight                                                                            |
| Skeie (332)     | Validity of self-reported body mass index among middle-aged participants in the Norwegian Women and Cancer study                                                 |
| Skorska (333)   | Sexual Orientation, Objective Height, and Self-Reported Height                                                                                                   |
| Smith (334)     | Accuracy of self-reported weight: covariation with binger or restrainer status and eating disorder symptomatology                                                |
| Spencer (335)   | Validity of self-reported height and weight in 4808 EPIC-Oxford participants                                                                                     |
| Stevens (336)   | Accuracy of current, 4-year, and 28-year self-reported body weight in an elderly population                                                                      |
| Stewart (337)   | Underestimation of relative weight by use of self-reported height and weight                                                                                     |
| Stommel (338)   | Temporal changes in bias of body mass index scores based on self-reported height and weight                                                                      |
| Stommel (339)   | Accuracy and usefulness of BMI measures based on self-reported weight and height: findings from the NHANES & NHIS 2001-2006                                      |
| Strauss (340)   | Comparison of measured and self-reported weight and height in a cross-sectional sample of young adolescents                                                      |
| Sullivan (341)  | Waist circumference is an independent correlate of errors in self-reported BMI                                                                                   |
| Sutcliffe (342) | Do people know whether they are overweight? Concordance of self-reported, interviewer-observed, and measured body size                                           |
| Sutin (343)     | Optimism, pessimism and bias in self-reported body weight among older adults                                                                                     |
| Swenne (344)    | Accuracy of reported weight and menstrual status in teenage girls with eating disorders                                                                          |

|                      |                                                                                                                                                                                              |
|----------------------|----------------------------------------------------------------------------------------------------------------------------------------------------------------------------------------------|
| Tamakoshi (345)      | The accuracy of long-term recall of past body weight in Japanese adult men                                                                                                                   |
| Tang (346)           | Self-reported and measured weights and heights among adults in Seattle and King County                                                                                                       |
| Taylor (347)         | How valid are self-reported height and weight? A comparison between CATI self-report and clinic measurements using a large cohort study                                                      |
| Tehard (348)         | Anthropometric measurements and body silhouette of women: validity and perception                                                                                                            |
| Teitelbaum (349)     | Inaccuracy of stated versus measured parental heights                                                                                                                                        |
| Tell (350)           | Can self-reported body weight be used to evaluate long-term follow-up of a weight-loss program?                                                                                              |
| Thomas (351)         | Consistency between Self-Reported and Recorded Values for Clinical Measures                                                                                                                  |
| Tienboon (352)       | Self-reported weight and height in adolescents and their parents                                                                                                                             |
| Toft-Petersen (353)  | Exploring the impact of using measured or estimated values for height and weight on the relationship between BMI and acute hospital mortality                                                |
| Tokmakidis (354)     | Validity of self-reported anthropometric values used to assess body mass index and estimate obesity in Greek school children                                                                 |
| Tolonen (355)        | Under-estimation of obesity, hypertension and high cholesterol by self-reported data: comparison of self-reported information and objective measures from health examination surveys         |
| Torres-McGehee (356) | Body image, anthropometric measures, and eating-disorder prevalence in auxiliary unit members                                                                                                |
| Troy (357)           | The validity of recalled weight among younger women                                                                                                                                          |
| Tsai (358)           | Accuracy of self-reported weight and height in women from Bogota, Colombia                                                                                                                   |
| Tsigilis (359)       | Can secondary school students' self-reported measures of height and weight be trusted? An effect size approach                                                                               |
| Tsuruda (360)        | Validity and reliability of self-reported health indicators among women attending organized mammographic screening                                                                           |
| Vailas (361)         | Self-reported versus measured weight and height in an older adult meal program population                                                                                                    |
| van der Voort (362)  | Screening for osteoporosis using easily obtainable biometrical data: diagnostic accuracy of measured, self-reported and recalled BMI, and related costs of bone mineral density measurements |
| Van Eenwyk (363)     | Comparison of examination-based and self-reported risk factors for cardiovascular disease, Washington State, 2006-2007                                                                       |
| van Valkengoed (364) | Ethnic differences in discrepancies between self-reported and measured weight, height and body mass index                                                                                    |
| Vartanian (365)      | Accuracy in estimating the body weight of self and others: Impact of dietary restraint and BMI                                                                                               |
| Vartanian (366)      | Accuracy in the estimation of body weight: an alternate test of the motivated-distortion hypothesis                                                                                          |
| Villanueva (367)     | The validity of self-reported weight in US adults: a population based cross-sectional study                                                                                                  |
| Villarini (368)      | Validation of Self-Reported Anthropometric Measures and Body Mass Index in a Subcohort of the DianaWeb Population Study                                                                      |



|                   |                                                                                                                                                                            |
|-------------------|----------------------------------------------------------------------------------------------------------------------------------------------------------------------------|
| Visscher (369)    | Underreporting of BMI in adults and its effect on obesity prevalence estimations in the period 1998 to 2001                                                                |
| Vuksanovic (370)  | Validity of self-reported BMI in older adults and an adjustment model                                                                                                      |
| Wada (371)        | Validity of self-reported height and weight in a Japanese workplace population                                                                                             |
| Wagaw (372)       | Linking Data From Health Surveys and Electronic Health Records: A Demonstration Project in Two Chicago Health Center Clinics                                               |
| Wang (373)        | Height and breast cancer risk--the bias of self-reported versus measured results. Comments on height and breast cancer risk, Tavani et al., Eur J Cancer 1998, 34, 543-547 |
| Wang (374)        | A comparison of self-reported and measured height, weight and BMI in Australian adolescents                                                                                |
| Weaver (375)      | Validation study of self-reported measures of fat distribution                                                                                                             |
| Wen (376)         | Sex and ethnic differences in validity of self-reported adult height, weight and body mass index                                                                           |
| White (377)       | Accuracy of self-reported weight and height in binge eating disorder: misreport is not related to psychological factors                                                    |
| White (378)       | Accuracy of self-reported weight among bariatric surgery candidates: the influence of race and weight cycling                                                              |
| Willey (379)      | Inaccuracy of height information on driver's licenses                                                                                                                      |
| Wise (380)        | Influence of body size and body fat distribution on risk of uterine leiomyomata in U.S. black women                                                                        |
| Wolfe (381)       | Accuracy of self-reported body weight and height in remitted anorexia nervosa                                                                                              |
| Wright (382)      | Validity over time of self-reported anthropometric variables during follow-up of a large cohort of UK women                                                                |
| Xie (383)         | Comparisons of measured and self-reported anthropometric variables and blood pressure in a sample of Hong Kong female nurses                                               |
| Yannakoulia (384) | Correlates of BMI misreporting among apparently healthy individuals: the ATTICA study                                                                                      |
| Yong (385)        | How accurate are self-reported height, weight, and BMI among community-dwelling elderly Japanese?: Evidence from a national population-based study                         |
| Yoon (386)        | Self-reported anthropometric information cannot vouch for the accurate assessment of obesity prevalence in populations of middle-aged and older Korean individuals         |
| Yoong (387)       | Agreement between self-reported and measured weight and height collected in general practice patients: a prospective study                                                 |
| Yoshitake (388)   | Validity of self-reported body mass index of Japanese children and adolescents                                                                                             |
| Yu (389)          | Validity of self-reported pregravid weight                                                                                                                                 |
| Zhang (390)       | The validity of self-reported height and weight in perimenopausal women                                                                                                    |
| Zhou (391)        | How accurate are self-reported height and weight in the seriously mentally ill?                                                                                            |
| Zhou (392)        | Validity of self-reported weight, height and resultant body mass index in Chinese adolescents and factors associated with errors in self-reports                           |

|                |                                                                                                                                       |
|----------------|---------------------------------------------------------------------------------------------------------------------------------------|
| Zhu (393)      | Comparison of self-report data and medical records data: results from a case-control study on prostate cancer                         |
| Ziebland (394) | Desire for the body normal: body image and discrepancies between self reported and measured height and weight in a British population |

1. Aasvee K, Rasmussen M, Kelly C, Kurvinen E, Giacchi MV, Ahluwalia N. Validity of self-reported height and weight for estimating prevalence of overweight among Estonian adolescents: the Health Behaviour in School-aged Children study. *BMC Res Notes*. 2015;8:606.
2. Abalkhail BA, Shawky S, Soliman NK. Validity of self-reported weight and height among Saudi school children and adolescents. *Saudi Med J*. 2002;23(7):831-837.
3. Abraham S, Luscombe G, Boyd C, Olesen I. Predictors of the accuracy of self-reported height and weight in adolescent female school students. *Int J Eat Disord*. 2004;36(1):76-82.
4. Acevedo P, Lopez-Ejeda N, Alferez-Garcia I, Martinez-Alvarez JR, Villarino A, Cabanas MD, Marrodan MD. Body mass index through self-reported data and body image perception in Spanish adults attending dietary consultation. *Nutrition*. 2014;30(6):679-684.
5. Ahluwalia IB, Tessaro I, Rye S, Parker L. Self-reported and clinical measurement of three chronic disease risks among low-income women in West Virginia. *J Womens Health (Larchmt)*. 2009;18(11):1857-1862.
6. Akhtar-Danesh N, Dehghan M, Merchant AT, Rainey JA. Validity of self-reported height and weight for measuring prevalence of obesity. *Open Med*. 2008;2(3):e83-88.
7. Ali MM, Minor T, Amialchuk A. Estimating the biases associated with self-perceived, self-reported, and measured BMI on mental health. *PLoS One*. 2013;8(12):e81021.
8. Alvarez-Torices JC, Franch-Nadal J, Alvarez-Guisasola F, Hernandez-Mejia R, Cueto-Espinar A. Self-reported height and weight and prevalence of obesity. Study in a Spanish population. *Int J Obes Relat Metab Disord*. 1993;17(11):663-667.
9. Ambrosi-Randic N, Bulian AP. Self-reported versus measured weight and height by adolescent girls: a Croatian sample. *Percept Mot Skills*. 2007;104(1):79-82.
10. Ambwani S, Chmielewski JF. Weighing the Evidence: Social Desirability, Eating Disorder Symptomatology, and Accuracy of Self-reported Body Weight Among Men and Women. *Sex Roles*. 2013;68(7):474-483.
11. Anai A, Ueda K, Harada K, Katoh T, Fukumoto K, Wei CN. Determinant factors of the difference between self-reported weight and measured weight among Japanese. *Environ Health Prev Med*. 2015;20(6):447-454.
12. Andersen LF, Lillegaard IT, Overby N, Lytle L, Klepp KI, Johansson L. Overweight and obesity among Norwegian schoolchildren: changes from 1993 to 2000. *Scand J Public Health*. 2005;33(2):99-106.
13. Araujo R, Gama S, Barros DC, Saunders C, Mattos IE. Validity of self-reported weight, height, and BMI in mothers of the research Birth in Brazil. *Rev Saude Publica*. 2017;51:115.
14. Avila-Funes JA, Gutierrez-Robledo LM, Ponce De Leon Rosales S. Validity of height and weight self-report in Mexican adults: results from the national health and aging study. *J Nutr Health Aging*. 2004;8(5):355-361.
15. Babiarczyk B, Sternal D. Accuracy of self-reported and measured anthropometric data in the inpatient population. *Int J Nurs Pract*. 2015;21(6):813-819.
16. Bae J, Joung H, Kim JY, Kwon KN, Kim Y, Park SW. Validity of self-reported height, weight, and body mass index of the Korea Youth Risk Behavior Web-based Survey questionnaire. *J Prev Med Public Health*. 2010;43(5):396-402.
17. Bannon AL, Waring ME, Leung K, Masiero JV, Stone JM, Scannell EC, Moore Simas TA. Comparison of Self-reported and Measured Pre-pregnancy Weight: Implications for Gestational Weight Gain Counseling. *Matern Child Health J*. 2017;21(7):1469-1478.
18. Barcenas CH, Wilkinson AV, Strom SS, Cao Y, Saunders KC, Mahabir S, Hernandez-Valero MA, et al. Birthplace, years of residence in the United States, and obesity among Mexican-American adults. *Obesity (Silver Spring)*. 2007;15(4):1043-1052.

19. Barnes RD, White MA, Masheb RM, Grilo CM. Accuracy of self-reported weight and height and resulting body mass index among obese binge eaters in primary care: relationship with eating disorder and associated psychopathology. *Prim Care Companion J Clin Psychiatry*. 2010;12(4).
20. Bayomi DJ, Tate RB. Ability and accuracy of long-term weight recall by elderly males: the Manitoba follow-up study. *Ann Epidemiol*. 2008;18(1):36-42.
21. Beghin L, Huybrechts I, Ortega FB, Coopman S, Manios Y, Wijnhoven TM, Duhamel A, et al. Nutritional and pubertal status influences accuracy of self-reported weight and height in adolescents: the HELENA Study. *Ann Nutr Metab*. 2013;62(3):189-200.
22. Berg IM, Simonsson B, Brantefor B, Ringqvist I. Prevalence of overweight and obesity in children and adolescents in a county in Sweden. *Acta Paediatr*. 2001;90(6):671-676.
23. Bes-Rastrollo M, Sabate J, Jaceldo-Siegl K, Fraser GE. Validation of self-reported anthropometrics in the Adventist Health Study 2. *BMC Public Health*. 2011;11:213.
24. Betz NE, Mintz L, Speakmon G. Gender differences in the accuracy of self-reported weight. *Sex Roles*. 1994;30(7-8):543-552.
25. Beyer R, Doerr HG. Observations of reported and measured heights of mothers of short statured children. *Ann Hum Biol*. 1998;25(4):387-390.
26. Bibiloni MD, Coll JL, Salas R, Pich J, Pons A, Tur JA. Ten-year trends (2000-2010) in bias of self-reported weight, height and body mass index in a Mediterranean adult population. *Nutr Hosp*. 2016;33(6):1367-1371.
27. Birrell F, Pearce MS, Francis RM, Parker L. Self-report overestimates true height loss: implications for diagnosis of osteoporosis. *Clin Rheumatol*. 2005;24(6):590-592.
28. Black DR, Taylor AM, Coster DC. Accuracy of self-reported body weight: Stepped Approach Model component assessment. *Health Educ Res*. 1998;13(2):301-307.
29. Blum KS, Busch N, Beyer T, Rausch I, Freudenberg LS. In patients we trust. Reliability of self-reported weight and size in patients attending a nuclear medicine department. *J Nucl Med Technol*. 2018.
30. Bolton-Smith C, Woodward M, Tunstall-Pedoe H, Morrison C. Accuracy of the estimated prevalence of obesity from self reported height and weight in an adult Scottish population. *J Epidemiol Community Health*. 2000;54(2):143-148.
31. Bonn SE, Trolle Lagerros Y, Balter K. How valid are Web-based self-reports of weight? *J Med Internet Res*. 2013;15(4):e52.
32. Booth ML, Hunter C, Gore CJ, Bauman A, Owen N. The relationship between body mass index and waist circumference: implications for estimates of the population prevalence of overweight. *Int J Obes Relat Metab Disord*. 2000;24(8):1058-1061.
33. Bostrom G, Diderichsen F. Socioeconomic differentials in misclassification of height, weight and body mass index based on questionnaire data. *Int J Epidemiol*. 1997;26(4):860-866.
34. Bowden C, Loughnan T. Assessing the accuracy of self-reported height and weight in an elective surgical population in a Melbourne metropolitan hospital. *Anaesth Intensive Care*. 2006;34(5):645-650.
35. Bowlin SJ, Morrill BD, Nafziger AN, Lewis C, Pearson TA. Reliability and changes in validity of self-reported cardiovascular disease risk factors using dual response: the behavioral risk factor survey. *J Clin Epidemiol*. 1996;49(5):511-517.
36. Bowlin SJ, Morrill BD, Nafziger AN, Jenkins PL, Lewis C, Pearson TA. Validity of cardiovascular disease risk factors assessed by telephone survey: the Behavioral Risk Factor Survey. *J Clin Epidemiol*. 1993;46(6):561-571.
37. Bowring AL, Peeters A, Freak-Poli R, Lim MS, Gouillou M, Hellard M. Measuring the accuracy of self-reported height and weight in a community-based sample of young people. *BMC Med Res Methodol*. 2012;12:175.

38. Braziuniene I, Wilson TA, Lane AH. Accuracy of self-reported height measurements in parents and its effect on mid-parental target height calculation. *BMC Endocr Disord.* 2007;7:2.
39. Brener ND, McManus T, Galuska DA, Lowry R, Wechsler H. Reliability and validity of self-reported height and weight among high school students. *J Adolesc Health.* 2003;32(4):281-287.
40. Brestoff JR, Perry IJ, Van den Broeck J. Challenging the role of social norms regarding body weight as an explanation for weight, height, and BMI misreporting biases: development and application of a new approach to examining misreporting and misclassification bias in surveys. *BMC Public Health.* 2011;11:331.
41. Brettschneider AK, Schaffrath Rosario A, Kuhnert R, Schmidt S, Wiegand S, Ellert U, Kurth BM. Updated prevalence rates of overweight and obesity in 11- to 17-year-old adolescents in Germany. Results from the telephone-based KiGGS Wave 1 after correction for bias in self-reports. *BMC Public Health.* 2015;15:1101.
42. Brettschneider AK, Schaffrath Rosario A, Wiegand S, Kollock M, Ellert U. Development and validation of correction formulas for self-reported height and weight to estimate BMI in adolescents. Results from the KiGGS study. *Obes Facts.* 2015;8(1):30-42.
43. Brettschneider AK, Ellert U, Schaffrath Rosario A. Comparison of BMI derived from parent-reported height and weight with measured values: results from the German KiGGS study. *Int J Environ Res Public Health.* 2012;9(2):632-647.
44. Brettschneider AK, Rosario AS, Ellert U. Validity and predictors of BMI derived from self-reported height and weight among 11- to 17-year-old German adolescents from the KiGGS study. *BMC Res Notes.* 2011;4:414.
45. Bridges MJ, Ruddick S. Can self-reported height and weight be used to calculate 10 year risk of osteoporotic fracture? *J Nutr Health Aging.* 2010;14(8):611-613.
46. Briot K, Legrand E, Pouchain D, Monnier S, Roux C. Accuracy of patient-reported height loss and risk factors for height loss among postmenopausal women. *CMAJ.* 2010;182(6):558-562.
47. Brooks-Gunn J, Warren MP, Rosso J, Gargiulo J. Validity of self-report measures of girls' pubertal status. *Child Dev.* 1987;58(3):829-841.
48. Brown JK, Feng JY, Knapp TR. Is self-reported height or arm span a more accurate alternative measure of height? *Clin Nurs Res.* 2002;11(4):417-432.
49. Brug J, Wammes B, Kremers S, Giskes K, Oenema A. Underestimation and overestimation of personal weight status: associations with socio-demographic characteristics and weight maintenance intentions. *J Hum Nutr Diet.* 2006;19(4):253-262.
50. Brunner Huber LR. Validity of self-reported height and weight in women of reproductive age. *Matern Child Health J.* 2007;11(2):137-144.
51. Burke MA, Carman KG. You can be too thin (but not too tall): Social desirability bias in self-reports of weight and height. *Econ Hum Biol.* 2017;27(Pt A):198-222.
52. Burton NW, Brown W, Dobson A. Accuracy of body mass index estimated from self-reported height and weight in mid-aged Australian women. *Aust N Z J Public Health.* 2010;34(6):620-623.
53. Butler R, McClinchy J, Morreale-Parker C, Marsh W, Rennie KL. BMI calculation in older people: The effect of using direct and surrogate measures of height in a community-based setting. *Clin Nutr ESPEN.* 2017;22:112-115.
54. Bутtenheim AM, Goldman N, Pebley AR. Underestimation of adolescent obesity. *Nurs Res.* 2013;62(3):195-202.
55. Cairns BJ, Liu B, Clennell S, Cooper R, Reeves GK, Beral V, Kuh D. Lifetime body size and reproductive factors: comparisons of data recorded prospectively with self reports in middle age. *BMC Med Res Methodol.* 2011;11(1):7.
56. Carter JC, Aime AA, Mills JS. Assessment of bulimia nervosa: a comparison of interview and self-report questionnaire methods. *Int J Eat Disord.* 2001;30(2):187-192.

57. Carvalho AM, Piovezan LG, Selem SS, Fisberg RM, Marchioni DM. Validation and calibration of self-reported weight and height from individuals in the city of Sao Paulo. *Rev Bras Epidemiol*. 2014;17(3):735-746.
58. Casey VA, Dwyer JT, Berkey CS, Coleman KA, Gardner J, Valadian I. Long-term memory of body weight and past weight satisfaction: a longitudinal follow-up study. *Am J Clin Nutr*. 1991;53(6):1493-1498.
59. Casey VA, Dwyer JT, Coleman KA, Krall EA, Gardner J, Valadian I. Accuracy of recall by middle-aged participants in a longitudinal study of their body size and indices of maturation earlier in life. *Ann Hum Biol*. 1991;18(2):155-166.
60. Cash TF, Counts B, Hangen J, Huffine CE. How Much Do You Weigh?: Determinants of Validity of Self-Reported Body Weight. *Percept Mot Skills*. 1989;69(1):248-250.
61. Castro R. The role of answering behaviours on weight misreporting. *Obes Res Clin Pract*. 2015;9(5):458-465.
62. Cawley J, Maclean JC, Hammer M, Wintfeld N. Reporting error in weight and its implications for bias in economic models. *Econ Hum Biol*. 2015;19:27-44.
63. Celis-Morales C, Livingstone KM, Woolhead C, Forster H, O'Donovan CB, Macready AL, Fallaize R, et al. How reliable is internet-based self-reported identity, socio-demographic and obesity measures in European adults? *Genes & nutrition*. 2015;10(5):28.
64. Chang H-H, Ver Ploeg S, Lin B-H. Changes in the propensity of overweight US women to under-assess their body weight status. *Food Policy*. 2010;35(4):358-364.
65. Chang VW, Christakis NA. Extent and determinants of discrepancy between self-evaluations of weight status and clinical standards. *J Gen Intern Med*. 2001;16(8):538-543.
66. Chau N, Chau K, Mayet A, Baumann M, Legleye S, Falissard B. Self-reporting and measurement of body mass index in adolescents: refusals and validity, and the possible role of socioeconomic and health-related factors. *BMC Public Health*. 2013;13:815.
67. Chen Y, Rennie DC, Lockinger LA, Dosman JA. Association between obesity and high blood pressure: reporting bias related to gender and age. *Int J Obes Relat Metab Disord*. 1998;22(8):771-777.
68. Chernenko A, Meeks H, Smith KR. Examining validity of body mass index calculated using height and weight data from the US driver license. *BMC Public Health*. 2019;19(1):100.
69. Chiolero A, Peytremann-Bridevaux I, Paccaud F. Associations between obesity and health conditions may be overestimated if self-reported body mass index is used. *Obes Rev*. 2007;8(4):373-374.
70. Chor D, Coutinho Eda S, Laurenti R. Reliability of self-reported weight and height among state bank employees. *Rev Saude Publica*. 1999;33(1):16-23.
71. Christian NJ, King WC, Yanovski SZ, Courcoulas AP, Belle SH. Validity of self-reported weights following bariatric surgery. *JAMA*. 2013;310(22):2454-2456.
72. Ciarapica D, Mauro B, Zaccaria M, Cannella C, Polito A. Validity of self-reported body weight and height among women including patients with eating disorders. *Eat Weight Disord*. 2010;15(1-2):e74-80.
73. Cizmecioglu F, Doherty A, Paterson WF, Young D, Donaldson MD. Measured versus reported parental height. *Arch Dis Child*. 2005;90(9):941-942.
74. Clarke P, Sastry N, Duffy D, Ailshire J. Accuracy of Self-Reported Versus Measured Weight Over Adolescence and Young Adulthood: Findings From the National Longitudinal Study of Adolescent Health, 1996-2008. *Am J Epidemiol*. 2014.
75. Collett-Solberg PF, Collett-Solberg PR. Comparison between Actual and Perceived Height of Parents of Children with Short Stature and Controls. *Int J Pediatr Endocrinol*. 2009;2009:919405.
76. Conde WL, Oliveira DR, Borges CA, Baraldi LG. Consistency between anthropometric measures in national surveys. *Rev Saude Publica*. 2013;47(1):69-76.
77. Conley A, Boardman JD. Weight overestimation as an indicator of disordered eating behaviors among young women in the United States. *Int J Eat Disord*. 2007;40(5):441-445.

78. Connor Gorber S, Tremblay MS. The bias in self-reported obesity from 1976 to 2005: a Canada-US comparison. *Obesity (Silver Spring)*. 2010;18(2):354-361.
79. Connor Gorber S, Shields M, Tremblay MS, McDowell I. The feasibility of establishing correction factors to adjust self-reported estimates of obesity. *Health Rep*. 2008;19(3):71-82.
80. Corsenac P, Annesi-Maesano I, Hoy D, Roth A, Rouchon B, Capart I, Taylor R. Overweight and obesity in New Caledonian adults: Results from measured and adjusted self-reported anthropometric data. *Diabetes Res Clin Pract*. 2017;133:193-203.
81. Courtemanche C, Pinkston JC, Stewart J. Adjusting body mass for measurement error with invalid validation data. *Econ Hum Biol*. 2015;19:275-293.
82. Craig BM, Adams AK. Accuracy of body mass index categories based on self-reported height and weight among women in the United States. *Matern Child Health J*. 2009;13(4):489-496.
83. Crawley HF, Portides G. Self-reported versus measured height, weight and body mass index amongst 16-17 year old British teenagers. *Int J Obes Relat Metab Disord*. 1995;19(8):579-584.
84. Cui Z, Stevens J, Truesdale KP, Zeng D, French S, Gordon-Larsen P. Prediction of Body Mass Index Using Concurrently Self-Reported or Previously Measured Height and Weight. *PLoS One*. 2016;11(11):e0167288.
85. Cullum A, McCarthy A, Gunnell D, Davey SG, Sterne JA, Ben-Shlomo Y. Dietary restraint and the mis-reporting of anthropometric measures by middle-aged adults. *Int J Obes Relat Metab Disord*. 2004;28(3):426-433.
86. Cuspidi C, Negri F, Giudici V, Muiesan ML, Grandi AM, Ganau A, Lonati L, et al. Self-reported weight and height: implications for left ventricular hypertrophy detection. An Italian multi-center study. *Clin Exp Hypertens*. 2011;33(3):192-201.
87. Dahl AK, Reynolds CA. Accuracy of recalled body weight--a study with 20-years of follow-up. *Obesity (Silver Spring)*. 2013;21(6):1293-1298.
88. Dahl AK, Hassing LB, Fransson EI, Pedersen NL. Agreement between self-reported and measured height, weight and body mass index in old age--a longitudinal study with 20 years of follow-up. *Age Ageing*. 2010;39(4):445-451.
89. Dalton WT, 3rd, Wang L, Southerland JL, Schetzina KE, Slawson DL. Self-reported versus actual weight and height data contribute to different weight misperception classifications. *South Med J*. 2014;107(6):348-355.
90. Daly AM, Parsons JE, Wood NA, Gill TK, Taylor AW. Using risk factor surveillance as a basis for mixed-methodology research: an example from Australia using food intake and anthropometric measures. *Int J Public Health*. 2010;55(6):655-660.
91. Danubio ME, Miranda G, Vinciguerra MG, Vecchi E, Rufo F. Comparison of self-reported and measured height and weight: implications for obesity research among young adults. *Econ Hum Biol*. 2008;6(1):181-190.
92. Dauphinot V, Wolff H, Naudin F, Gueguen R, Sermet C, Gaspoz JM, Kossovsky MP. New obesity body mass index threshold for self-reported data. *J Epidemiol Community Health*. 2009;63(2):128-132.
93. Davidson J, Randall GK, Getz MA. Self-reported height, calculated height, and derived body mass index in assessment of older adults. *J Nutr Elder*. 2009;28(4):359-371.
94. Davis H, Gergen PJ. The weights and heights of Mexican-American adolescents: the accuracy of self-reports. *Am J Public Health*. 1994;84(3):459-462.
95. De Vriendt T, Huybrechts I, Ottevaere C, Van Trimont I, De Henauw S. Validity of self-reported weight and height of adolescents, its impact on classification into BMI-categories and the association with weighing behaviour. *Int J Environ Res Public Health*. 2009;6(10):2696-2711.
96. Dekkers JC, van Wier MF, Hendriksen IJ, Twisk JW, van Mechelen W. Accuracy of self-reported body weight, height and waist circumference in a Dutch overweight working population. *BMC Med Res Methodol*. 2008;8:69.

97. DelPrete LR, Caldwell M, English C, Banspach SW, Lefebvre C. Self-reported and measured weights and heights of participants in community-based weight loss programs. *J Am Diet Assoc.* 1992;92(12):1483-1486.
98. Dhaliwal SS, Howat P, Bejoy T, Welborn TA. Self-reported weight and height for evaluating obesity control programs. *Am J Health Behav.* 2010;34(4):489-499.
99. Dijkshoorn H, Ujic-Voortman JK, Viet L, Verhoeff AP, Uitenbroek DG. Ethnic variation in validity of the estimated obesity prevalence using self-reported weight and height measurements. *BMC Public Health.* 2011;11:408.
100. Doll HA, Fairburn CG. Heightened accuracy of self-reported weight in bulimia nervosa: a useful cognitive "distortion". *Int J Eat Disord.* 1998;24(3):267-273.
101. Drake KM, Longacre MR, Dalton MA, Langeloh G, Peterson KE, Titus LJ, Beach ML. Two-method measurement for adolescent obesity epidemiology: reducing the bias in self-report of height and weight. *J Adolesc Health.* 2013;53(3):322-327.
102. Drieskens S, Demarest S, Bel S, De Ridder K, Tafforeau J. Correction of self-reported BMI based on objective measurements: a Belgian experience. *Arch Public Health.* 2018;76:10.
103. Duran AC, Florindo AA, Jaime PC. Can self-reported height and weight be used among people living with HIV/AIDS? *Int J STD AIDS.* 2012;23(4):e1-6.
104. Dutton DJ, McLaren L. The usefulness of "corrected" body mass index vs. self-reported body mass index: comparing the population distributions, sensitivity, specificity, and predictive utility of three correction equations using Canadian population-based data. *BMC Public Health.* 2014;14:430.
105. Dzakpasu S, Duggan J, Fahey J, Kirby RS. Estimating bias in derived body mass index in the Maternity Experiences Survey. *Health Promot Chronic Dis Prev Can.* 2016;36(9):185-193.
106. Ekstrom S, Kull I, Nilsson S, Bergstrom A. Web-based self-reported height, weight, and body mass index among Swedish adolescents: a validation study. *J Med Internet Res.* 2015;17(3):e73.
107. Elgar FJ, Stewart JM. Validity of self-report screening for overweight and obesity. Evidence from the Canadian Community Health Survey. *Can J Public Health.* 2008;99(5):423-427.
108. Elgar FJ, Roberts C, Tudor-Smith C, Moore L. Validity of self-reported height and weight and predictors of bias in adolescents. *J Adolesc Health.* 2005;37(5):371-375.
109. Ellert U, Brettschneider AK, Wiegand S, Kurth BM. Applying a correction procedure to the prevalence estimates of overweight and obesity in the German part of the HBSC study. *BMC Res Notes.* 2014;7:181.
110. Ezzati M, Martin H, Skjold S, Vander HS, Murray CJ. Trends in national and state-level obesity in the USA after correction for self-report bias: analysis of health surveys. *J R Soc Med.* 2006;99(5):250-257.
111. Farre Rovira R, Frasset Pons I, Martinez Martinez MI, Roma Sanchez R. Self-reported versus measured height, weight and body mass index in Spanish Mediterranean teenagers: effects of gender, age and weight on perceptual measures of body image. *Ann Nutr Metab.* 2002;46(2):68-72.
112. Fernandez-Rhodes L, Robinson WR, Sotres-Alvarez D, Franceschini N, Castaneda SF, Buelna C, Moncrieff A, et al. Accuracy of Self-reported Weight in Hispanic/Latino Adults of the Hispanic Community Health Study/Study of Latinos. *Epidemiology.* 2017;28(6):847-853.
113. Field AE, Aneja P, Rosner B. The validity of self-reported weight change among adolescents and young adults. *Obesity (Silver Spring).* 2007;15(9):2357-2364.
114. Fillenbaum GG, Kuchibhatla MN, Whitson HE, Batch BC, Svetkey LP, Pieper CF, Kraus WE, et al. Accuracy of self-reported height and weight in a community-based sample of older African Americans and whites. *J Gerontol A Biol Sci Med Sci.* 2010;65(10):1123-1129.
115. Finardi P, Nickel CH, Koller MT, Bingisser R. Accuracy of self-reported weight in a high risk geriatric population in the emergency department. *Swiss Med Wkly.* 2012;142:w13585.



116. Flood V, Webb K, Lazarus R, Pang G. Use of self-report to monitor overweight and obesity in populations: some issues for consideration. *Aust N Z J Public Health*. 2000;24(1):96-99.
117. Fonseca H, Silva AM, Matos MG, Esteves I, Costa P, Guerra A, Gomes-Pedro J. Validity of BMI based on self-reported weight and height in adolescents. *Acta Paediatr*. 2010;99(1):83-88.
118. Fortenberry JD. Reliability of adolescents' reports of height and weight. *J Adolesc Health*. 1992;13(2):114-117.
119. Frayon S, Cavaloc Y, Wattelez G, Cherrier S, Lerrant Y, Galy O. Self-Reported Height and Weight in Oceanian School-Going Adolescents and Factors Associated With Errors. *Asia Pac J Public Health*. 2017;29(6):526-536.
120. Frid H, Adolfsson ET, Rosenblad A, Nydahl M. Agreement between different methods of measuring height in elderly patients. *J Hum Nutr Diet*. 2013;26(5):504-511.
121. Gay J, Monsma EV, Torres-McGehee T. Give or take a few? Comparing measured and self-reported height and weight as correlates of social physique anxiety. *Res Q Exerc Sport*. 2009;80(3):656-662.
122. Gebremariam MK, Andersen LF, Bjelland M, Bergh IH, Totland TH, Ommundsen Y, Grydeland M, et al. Are weight-related attitudes and behaviours associated with the accuracy of BMI derived from self-reported weight and height among 13-year-olds? *Scand J Public Health*. 2015;43(2):130-137.
123. Geurden B, Franck E, Van Looy L, Weyler J, Ysebaert D. Self-reported body weight and height on admission to hospital: a reliable method in multi-professional evidence-based nutritional care? *Int J Nurs Pract*. 2012;18(5):509-517.
124. Ghosh-Dastidar MB, Haas AC, Nicosia N, Datar A. Accuracy of BMI correction using multiple reports in children. *BMC Obes*. 2016;3(1):37.
125. Giacchi M, Mattei R, Rossi S. Correction of the self-reported BMI in a teenage population. *Int J Obes Relat Metab Disord*. 1998;22(7):673-677.
126. Gil J, Mora T. The determinants of misreporting weight and height: The role of social norms. *Econ Hum Biol*. 2011;9(1):78-91.
127. Gildner TE, Barrett TM, Liebert MA, Kowal P, Snodgrass JJ. Does BMI generated by self-reported height and weight measure up in older adults from middle-income countries? Results from the study on global AGEing and adult health (SAGE). *BMC Obes*. 2015;2:44.
128. Giles E, Hutchinson DL. Stature- and age-related bias in self-reported stature. *J Forensic Sci*. 1991;36(3):765-780.
129. Gillum RF, Sempos CT. Ethnic variation in validity of classification of overweight and obesity using self-reported weight and height in American women and men: the Third National Health and Nutrition Examination Survey. *Nutr J*. 2005;4:27.
130. Gokler ME, Bugrul N, Sari AO, Metintas S. The validity of self-reported vs. measured body weight and height and the effect of self-perception. *Arch Med Sci*. 2018;14(1):174-181.
131. Goodman E, Strauss RS. Self-reported height and weight and the definition of obesity in epidemiological studies. *J Adolesc Health*. 2003;33(3):140-141; author reply 141-142.
132. Goodman E, Hinden BR, Khandelwal S. Accuracy of teen and parental reports of obesity and body mass index. *Pediatrics*. 2000;106(1 Pt 1):52-58.
133. Gozzi T, Fluck C, L'Allemand D, Dattani MT, Hindmarsh PC, Mullis PE. Do centimetres matter? Self-reported versus estimated height measurements in parents. *Acta Paediatr*. 2010;99(4):569-574.
134. Griebeler ML, Levis S, Beringer LM, Chacra W, Gomez-Marin O. Self-reported versus measured height and weight in Hispanic and non-Hispanic menopausal women. *J Womens Health*. 2011;20(4):599-604.
135. Grossschadl F, Haditsch B, Stronegger WJ. Validity of self-reported weight and height in Austrian adults: sociodemographic determinants and consequences for the classification of BMI categories. *Public Health Nutr*. 2012;15(1):20-27.

136. Gunnare NA, Silliman K, Morris MN. Accuracy of self-reported weight and role of gender, body mass index, weight satisfaction, weighing behavior, and physical activity among rural college students. *Body Image*. 2013;10(3):406-410.
137. Gunnell D, Berney L, Holland P, Maynard M, Blane D, Frankel S, Smith GD. How accurately are height, weight and leg length reported by the elderly, and how closely are they related to measurements recorded in childhood? *Int J Epidemiol*. 2000;29(3):456-464.
138. Haapanen-Niemi N, Miilunpalo S, Pasanen M, Vuori I, Oja P, Malmberg J. Body mass index, physical inactivity and low level of physical fitness as determinants of all-cause and cardiovascular disease mortality--16 y follow-up of middle-aged and elderly men and women. *Int J Obes Relat Metab Disord*. 2000;24(11):1465-1474.
139. Han E, Abrams B, Sridhar S, Xu F, Hedderson M. Validity of Self-Reported Pre-Pregnancy Weight and Body Mass Index Classification in an Integrated Health Care Delivery System. *Paediatr Perinat Epidemiol*. 2016;30(4):314-319.
140. Harvey-Berino J, Krukowski RA, Buzzell P, Ogden D, Skelly J, West DS. The accuracy of weight reported in a web-based obesity treatment program. *Telemed J E Health*. 2011;17(9):696-699.
141. Hattori A, Sturm R. The obesity epidemic and changes in self-report biases in BMI. *Obesity (Silver Spring)*. 2013;21(4):856-860.
142. Hauck FR, White L, Cao G, Woolf N, Strauss K. Inaccuracy of self-reported weights and heights among American Indian adolescents. *Ann Epidemiol*. 1995;5(5):386-392.
143. Haverkort EB, de Haan RJ, Binnekade JM, van Bokhorst-de van der Schueren MA. Self-reporting of height and weight: valid and reliable identification of malnutrition in preoperative patients. *Am J Surg*. 2012;203(6):700-707.
144. Hayes AJ, Clarke PM, Lung TW. Change in bias in self-reported body mass index in Australia between 1995 and 2008 and the evaluation of correction equations. *Popul Health Metr*. 2011;9:53.
145. Hayes AJ, Kortt MA, Clarke PM, Brandrup JD. Estimating equations to correct self-reported height and weight: implications for prevalence of overweight and obesity in Australia. *Aust N Z J Public Health*. 2008;32(6):542-545.
146. Heaney RP, Ryan R. Relation between measured and recalled body height. *N Engl J Med*. 1988;319(12):795-796.
147. Hendershot KM, Robinson L, Roland J, Vaziri K, Rizzo AG, Fakhry SM. Estimated height, weight, and body mass index: implications for research and patient safety. *J Am Coll Surg*. 2006;203(6):887-893.
148. Hernan A, Philpot B, Janus ED, Dunbar JA. Recruitment into diabetes prevention programs: what is the impact of errors in self-reported measures of obesity? *BMC Public Health*. 2012;12:510.
149. Hill A, Roberts J. Body mass index: a comparison between self-reported and measured height and weight. *J Public Health Med*. 1998;20(2):206-210.
150. Himes JH, Hannan P, Wall M, Neumark-Sztainer D. Factors associated with errors in self-reports of stature, weight, and body mass index in Minnesota adolescents. *Ann Epidemiol*. 2005;15(4):272-278.
151. Himes JH, Faricy A. Validity and reliability of self-reported stature and weight of US adolescents. *Am J Hum Biol*. 2001;13(2):255-260.
152. Himes JH, Story M. Validity of self-reported weight and stature of American Indian youth. *J Adolesc Health*. 1992;13(2):118-120.
153. Hodgson A, Griffiths CS, King MJ. Body mass index: a comparison between self-reported and measured height and weight. *J Public Health Med*. 1999;21(1):116-117.
154. Holland E, Moore Simas TA, Doyle Curiale DK, Liao X, Waring ME. Self-reported pre-pregnancy weight versus weight measured at first prenatal visit: effects on categorization of pre-pregnancy body mass index. *Matern Child Health J*. 2013;17(10):1872-1878.
155. Hongjun Y, Chunmei C, An R. Regression Models to Predict Corrected Height, Weight, and Obesity Indicators among University Students in Beijing, China. *Am J Health Behav*. 2018;42(6):70-77.

156. Hsiao H, Weaver D, Hsiao J, Whitestone J, Kau TY, Whisler R, Ferri R. Comparison of measured and self-reported anthropometric information among firefighters: implications and applications. *Ergonomics*. 2014;57(12):1886-1897.
157. Hussain S, Taylor M, Waltermaurer E, McCauley J, Ford DE, Campbell JC, McNutt LA. Computer-administered screening of reproductive-aged women for diabetes risk in primary care settings, feasibility and acceptability of such screening, and validity of risk assessments based on self-reported weight. *Prev Chronic Dis*. 2007;4(3):A54.
158. Hussey JM, Nguyen QC, Whitsel EA, Richardson LJ, Halpern CT, Gordon-Larsen P, Tabor JW, et al. The reliability of in-home measures of height and weight in large cohort studies: Evidence from Add Health. *Demogr Res*. 2015;32:1081-1098.
159. Ikeda N. Validity of Self-Reports of Height and Weight among the General Adult Population in Japan: Findings from National Household Surveys, 1986. *PLoS One*. 2016;11(2):e0148297.
160. Imrhan SN, Imrhan V, Hart C. Can self-estimates of body weight and height be used in place of measurements for college students? *Ergonomics*. 1996;39(12):1445-1453.
161. Isidoro B, Lope V, Pedraz-Pingarron C, Collado-Garcia F, Santamarina C, Moreo P, Vidal C, et al. Validation of obesity based on self-reported data in Spanish women participants in breast cancer screening programmes. *BMC Public Health*. 2011;11:960.
162. Jacobson BH, DeBock DH. Comparison of Body Mass Index by self-reported versus measured height and weight. *Percept Mot Skills*. 2001;92(1):128-132.
163. Jain RB. Regression models to predict corrected weight, height and obesity prevalence from self-reported data: data from BRFSS 1999-2007. *Int J Obes(Lond)*. 2010;34(11):1655-1664.
164. Jalkanen L, Tuomilehto J, Tanskanen A, Puska P. Accuracy of self-reported body weight compared to measured body weight. A population survey. *Scand J Soc Med*. 1987;15(3):191-198.
165. Jansen W, van de Looij-Jansen PM, Ferreira I, de Wilde EJ, Brug J. Differences in measured and self-reported height and weight in Dutch adolescents. *Ann Nutr Metab*. 2006;50(4):339-346.
166. Jayawardene W, Lohrmann D, YoussefAgha A. Discrepant body mass index: behaviors associated with height and weight misreporting among US adolescents from the National Youth Physical Activity and Nutrition Study. *Child Obes*. 2014;10(3):225-233.
167. Jeffery RW, Finch EA, Linde JA, Simon GE, Ludman EJ, Operskalski BH, Rohde P, et al. Does clinical depression affect the accuracy of self-reported height and weight in obese women? *Obesity (Silver Spring)*. 2008;16(2):473-475.
168. Jeffery RW. Bias in reported body weight as a function of education, occupation, health and weight concern. *Addict Behav*. 1996;21(2):217-222.
169. Jeffs E, Sharp B, Gullam J, Paterson H. Weight and height measurement: potential impact in obstetric care. *N Z Med J*. 2014;127(1392):17-26.
170. Jenkins TM, Boyce TW, Ralph Buncher C, Zeller MH, Courcoulas AP, Evans M, Inge TH. Accuracy of Self-Reported Weight Among Adolescent and Young Adults Following Bariatric Surgery. *Obes Surg*. 2017;27(6):1529-1532.
171. Jenkins TM, Buncher CR, Akers R, Daniels SR, Lawson ML, Khoury PR, Wilson TP, et al. Validation of a weight history questionnaire to identify adolescent obesity. *Obes Surg*. 2013;23(9):1404-1412.
172. Jerome GJ, Dalcin A, Coughlin JW, Fitzpatrick S, Wang NY, Durkin N, Yeh HC, et al. Longitudinal accuracy of web-based self-reported weights: results from the Hopkins POWER Trial. *J Med Internet Res*. 2014;16(7):e173.
173. John U, Hanke M, Grothues J, Thyrian JR. Validity of overweight and obesity in a nation based on self-report versus measurement device data. *Eur J Clin Nutr*. 2006;60(3):372-377.
174. Johnson WD, Bouchard C, Newton RL, Jr., Ryan DH, Katzmarzyk PT. Ethnic differences in self-reported and measured obesity. *Obesity (Silver Spring)*. 2009;17(3):571-577.

175. Katsnelson MJ, Peterlin BL, Rosso AL, Alexander GM, Erwin KL. Self-reported vs measured body mass indices in migraineurs. *Headache*. 2009;49(5):663-668.
176. Kawada T, Suzuki S. Validation study on self-reported height, weight, and blood pressure. *Percept Mot Skills*. 2005;101(1):187-191.
177. Kee CC, Lim KH, Sumarni MG, Teh CH, Chan YY, Nuur Hafizah MI, Cheah YK, et al. Validity of self-reported weight and height: a cross-sectional study among Malaysian adolescents. *BMC Med Res Methodol*. 2017;17(1):85.
178. Keith SW, Fontaine KR, Pajewski NM, Mehta T, Allison DB. Use of self-reported height and weight biases the body mass index-mortality association. *Int J Obes(Lond)*. 2011;35(3):401-408.
179. Kinney EL. Accuracy of self-reported weight in a non-normal population. *Clin Invest Med*. 1988;11(5):347-350.
180. Kintziou E, Nikolaidis PT, Kefala V, Rosemann T, Knechtle B. Validity of Self-Reported Body Mass, Height, and Body Mass Index in Female Students: The Role of Physical Activity Level, Menstrual Cycle Phase, and Time of Day. *Int J Environ Res Public Health*. 2019;16(7).
181. Klag MJ, He J, Mead LA, Ford DE, Pearson TA, Levine DM. Validity of physicians' self-reports of cardiovascular disease risk factors. *Ann Epidemiol*. 1993;3(4):442-447.
182. Knechtle B, Rust CA, Rosemann T, Knechtle P, Bescos R. Estimation bias: body mass and body height in endurance athletes. *Percept Mot Skills*. 2012;115(3):833-844.
183. Konstantynowicz J, Bialokoz-Kalinowska I. Some remarks on self-reported and measured height and weight in adolescents. *J Adolesc Health*. 2006;38(4):334; author reply 335.
184. Kovalchik S. Validity of adult lifetime self-reported body weight. *Public Health Nutr*. 2009;12(8):1072-1077.
185. Krakowiak P, Walker CK, Tancredi DJ, Hertz-Picciotto I. Maternal Recall Versus Medical Records of Metabolic Conditions from the Prenatal Period: A Validation Study. *Matern Child Health J*. 2015;19(9):1925-1935.
186. Krul AJ, Daanen HA, Choi H. Self-reported and measured weight, height and body mass index (BMI) in Italy, the Netherlands and North America. *Eur J Public Health*. 2011;21(4):414-419.
187. Kuczmarski MF, Kuczmarski RJ, Najjar M. Effects of age on validity of self-reported height, weight, and body mass index: findings from the Third National Health and Nutrition Examination Survey, 1988-1994. *J Am Diet Assoc*. 2001;101(1):28-34.
188. Kuriyama S, Tsuji I, Ohkubo T, Anzai Y, Takahashi K, Watanabe Y, Nishino Y, et al. Medical care expenditure associated with body mass index in Japan: the Ohsaki Study. *Int J Obes Relat Metab Disord*. 2002;26(8):1069-1074.
189. Kurth BM, Ellert U. Estimated and measured BMI and self-perceived body image of adolescents in Germany: part 1 - general implications for correcting prevalence estimations of overweight and obesity. *Obes Facts*. 2010;3(3):181-190.
190. Kuskowska-Wolk A, Rossner S. Self-reported weight and height considerably affect the weight distribution of a population. *Scand J Soc Med*. 1992;20(3):188-189.
191. Kuskowska-Wolk A, Bergstrom R, Bostrom G. Relationship between questionnaire data and medical records of height, weight and body mass index. *Int J Obes Relat Metab Disord*. 1992;16(1):1-9.
192. Kuskowska-Wolk A, Bostrom G, Rossner S. Influence of body image on estimation of body mass index based on self-reported weight and height. *Diabetes Res Clin Pract*. 1990;10 Suppl 1:S155-158.
193. Kuskowska-Wolk A, Rossner S. The "true" prevalence of obesity. A comparison of objective weight and height measures versus self-reported and calibrated data. *Scand J Prim Health Care*. 1989;7(2):79-82.
194. Kuskowska-Wolk A, Karlsson P, Stolt M, Rossner S. The predictive validity of body mass index based on self-reported weight and height. *Int J Obes*. 1989;13(4):441-453.

195. Kyulo NL, Knutsen SF, Tonstad S, Fraser GE, Singh PN. Validation of recall of body weight over a 26-year period in cohort members of the Adventist Health Study 2. *Ann Epidemiol.* 2012;22(10):744-746.
196. Lackland DT, Wheeler FC. The need for accurate nutrition survey methodology: the South Carolina experience. *J Nutr.* 1990;120(Suppl 11):1433-1436.
197. Larsen JK, Ouwens M, Engels RC, Eisinga R, van Strien T. Validity of self-reported weight and height and predictors of weight bias in female college students. *Appetite.* 2008;50(2-3):386-389.
198. Larson MR. Social desirability and self-reported weight and height. *Int J Obes Relat Metab Disord.* 2000;24(5):663-665.
199. Lassale C, Peneau S, Touvier M, Julia C, Galan P, Hercberg S, Kesse-Guyot E. Validity of web-based self-reported weight and height: results of the Nutrinet-Sante study. *J Med Internet Res.* 2013;15(8):e152.
200. Lawlor DA, Bedford C, Taylor M, Ebrahim S. Agreement between measured and self-reported weight in older women. Results from the British Women's Heart and Health Study. *Age Ageing.* 2002;31(3):169-174.
201. Le Marchand L, Yoshizawa CN, Nomura AM. Validation of body size information on driver's licenses. *Am J Epidemiol.* 1988;128(4):874-877.
202. Leatherdale ST, Laxer RE. Reliability and validity of the weight status and dietary intake measures in the COMPASS questionnaire: are the self-reported measures of body mass index (BMI) and Canada's food guide servings robust? *Int J Behav Nutr Phys Act.* 2013;10:42.
203. Lee DH, Shin A, Kim J, Yoo KY, Sung J. Validity of self-reported height and weight in a Korean population. *J Epidemiol.* 2011;21(1):30-36.
204. Lee K, Valeria B, Kochman C, Lenders CM. Self-assessment of height, weight, and sexual maturation: validity in overweight children and adolescents. *J Adolesc Health.* 2006;39(3):346-352.
205. Lee SK. Validity of self-reported weight and height: comparison between immigrant and non-immigrant Mexican Americans in NHANES III. *J Immigr Health.* 2005;7(2):127-131.
206. Legleye S, Beck F, Spilka S, Chau N. Correction of body-mass index using body-shape perception and socioeconomic status in adolescent self-report surveys. *PLoS One.* 2014;9(5):e96768.
207. LeJarraga H, Laspuir M, Adamo P. Validity of reported parental height in outpatient growth clinics in Buenos Aires city. *Ann Hum Biol.* 1995;22(2):163-166.
208. Leone RJ, Morgan AL, Ludy MJ. Validation of Self-Reported Anthropometrics in Female College Freshmen. *Int J Exerc Sci.* 2016;9(1):47-55.
209. Liechty JM, Bi X, Qu A. Feasibility and validity of a statistical adjustment to reduce self-report bias of height and weight in wave 1 of the Add Health study. *BMC Med Res Methodol.* 2016;16(1):124.
210. Lim LL, Seubsman SA, Sleigh A. Validity of self-reported weight, height, and body mass index among university students in Thailand: Implications for population studies of obesity in developing countries. *Popul Health Metr.* 2009;7:15.
211. Lim U, Wilkens LR, Albright CL, Novotny R, Le Marchand L, Kolonel LN. University of Hawai'i Cancer Center Connection: bias in self-reported anthropometry in relation to adiposity and adulthood weight gain among postmenopausal Caucasian and Japanese American Women. *Hawaii J Med Public Health.* 2013;72(12):445-449.
212. Lin CJ, DeRoo LA, Jacobs SR, Sandler DP. Accuracy and reliability of self-reported weight and height in the Sister Study. *Public Health Nutr.* 2012;15(6):989-999.
213. Linder J, McLaren L, Siou GL, Cszimadi I, Robson PJ. The epidemiology of weight perception: perceived versus self-reported actual weight status among Albertan adults. *Can J Public Health.* 2010;101(1):56-60.
214. Linhart Y, Romano-Zelekha O, Shohat T. Validity of self-reported weight and height among 13-14 year old schoolchildren in Israel. *Isr Med Assoc J.* 2010;12(10):603-605.

215. Lipsky LM, Haynie DL, Hill C, Nansel TR, Li K, Liu D, Iannotti RJ, et al. Accuracy of Self-Reported Height, Weight, and BMI Over Time in Emerging Adults. *Am J Prev Med*. 2019.
216. Ljungvall A, Gerdtham UG, Lindblad U. Misreporting and misclassification: implications for socioeconomic disparities in body-mass index and obesity. *Eur J Health Econ*. 2013;16(1):5-20.
217. Lois K, Kumar S, Williams N, Birrell L. Can self-reported height and weight be relied upon? *Occup Med (Lond)*. 2011;61(8):590-592.
218. Lopuszanska M, Lipowicz A, Kolodziej H, Szklarska A, Bielicki T. Self-reported versus measured body height and weight in Polish adult men: the risk of underestimating obesity rates. *Anthropol Anz*. 2015;72(3):263-277.
219. Lu S, Su J, Xiang Q, Zhou J, Wu M. Accuracy of self-reported height, weight, and waist circumference in a general adult Chinese population. *Popul Health Metr*. 2016;14:30.
220. Lucca A, Moura EC. Validity and reliability of self-reported weight, height and body mass index from telephone interviews. *Cad Saude Publica*. 2010;26(1):110-122.
221. Luo J, Thomson CA, Hendryx M, Tinker LF, Manson JE, Li Y, Nelson DA, et al. Accuracy of self-reported weight in the Women's Health Initiative. *Public Health Nutr*. 2018:1-10.
222. Lyons AA, Park J, Nelson CH. Food insecurity and obesity: a comparison of self-reported and measured height and weight. *Am J Public Health*. 2008;98(4):751-757.
223. Macgregor S, Cornes BK, Martin NG, Visscher PM. Bias, precision and heritability of self-reported and clinically measured height in Australian twins. *Hum Genet*. 2006;120(4):571-580.
224. MacLellan DL, Taylor RD, Van Til L, Sweet L. Measured weights in PEI adults reveal higher than expected obesity rates. *Can J Public Health*. 2004;95(3):174-178.
225. Madden D. Adjusting the obesity thresholds for self-reported BMI in Ireland: a cross-sectional analysis. *BMJ Open*. 2013;3(5).
226. Magnusson K, Haugen IK, Osteras N, Nordstletten L, Natvig B, Hagen KB. The validity of self-reported body mass index in a population-based osteoarthritis study. *BMC Musculoskelet Disord*. 2014;15:442.
227. Mai X, Sperrazza JN, Marshall BA, Hovey KM, Wactawski-Wende J. Inaccurate self-report of height and its impact on misclassification of body mass index in postmenopausal women. *Menopause*. 2017;24(5):484-489.
228. Mandujano A, Huston-Presley L, Waters TP, Catalano PM. Women's reported weight: is there a discrepancy? *J Matern Fetal Neonatal Med*. 2012;25(8):1395-1398.
229. Martin RC, Grier T, Canham-Chervak M, Anderson MK, Bushman TT, DeGroot DW, Jones BH. Validity of Self-Reported Physical Fitness and Body Mass Index in a Military Population. *J Strength Cond Res*. 2016;30(1):26-32.
230. Martins PC, de Carvalho MB, Machado CJ. Use of self-reported measures of height, weight and body mass index in a rural population of Northeast Brazil. *Rev Bras Epidemiol*. 2015;18(1):137-148.
231. Masheb RM, Grilo CM. Accuracy of self-reported weight in patients with binge eating disorder. *Int J Eat Disord*. 2001;29(1):29-36.
232. Maupin JN, Hruschka DJ. Assessing the accuracy of two proxy measures for BMI in a semi-rural, low-resource setting in Guatemala. *BMC Public Health*. 2014;14:973.
233. May AM, Barnes DR, Forouhi NG, Luben R, Khaw KT, Wareham NJ, Peeters PH, et al. Prediction of measured weight from self-reported weight was not improved after stratification by body mass index. *Obesity (Silver Spring)*. 2013;21(1):E137-142.
234. McAdams MA, van Dam RM, Hu FB. Comparison of self-reported and measured BMI as correlates of disease markers in US adults. *Obesity (Silver Spring)*. 2007;15(1):188-196.
235. McCabe RE, McFarlane T, Polivy J, Olmsted MP. Eating disorders, dieting, and the accuracy of self-reported weight. *Int J Eat Disord*. 2001;29(1):59-64.

236. Meng H, He XZ, Dixon D. Self-reported versus measured height and weight in the health and retirement study. *J Am Geriatr Soc.* 2010;58(2):412-413.
237. Merrill RM, Richardson JS. Validity of self-reported height, weight, and body mass index: findings from the National Health and Nutrition Examination Survey, 2001-2006. *Prev Chronic Dis.* 2009;6(4):A121.
238. Meyer C, Arcelus J, Wright S. Accuracy of self-reported weight and height among women with eating disorders: a replication and extension study. *Eur Eat Disord Rev.* 2009;17(5):366-370.
239. Meyer C, McPartlan L, Sines J, Waller G. Accuracy of self-reported weight and height: relationship with eating psychopathology among young women. *Int J Eat Disord.* 2009;42(4):379-381.
240. Millar WJ. Distribution of body weight and height: comparison of estimates based on self-reported and observed measures. *J Epidemiol Community Health.* 1986;40(4):319-323.
241. Moreira NF, Luz VG, Moreira CC, Pereira RA, Sichieri R, Ferreira MG, Muraro AP, et al. Self-reported weight and height are valid measures to determine weight status: results from the Brazilian National Health Survey (PNS 2013). *Cad Saude Publica.* 2018;34(5):e00063917.
242. Morgan PJ, Jeffrey DB. Restraint, weight suppression, and self-report reliability: how much do you really weigh? *Addict Behav.* 1999;24(5):679-682.
243. Morrissey SL, Whetstone LM, Cummings DM, Owen LJ. Comparison of self-reported and measured height and weight in eighth-grade students. *J Sch Health.* 2006;76(10):512-515.
244. Mozumdar A, Liguori G. Corrective Equations to Self-Reported Height and Weight for Obesity Estimates Among U.S. Adults: NHANES 1999-2008. *Res Q Exerc Sport.* 2016;87(1):47-58.
245. Mozumdar A, Liguori G. Correction equations to adjust self-reported height and weight for obesity estimates among college students. *Res Q Exerc Sport.* 2011;82(3):391-399.
246. Mueller KG, Hurt RT, Abu-Lebdeh HS, Mueller PS. Self-perceived vs actual and desired weight and body mass index in adult ambulatory general internal medicine patients: a cross sectional study. *BMC Obes.* 2014;1:26.
247. Munoz KA, Ballard-Barbash R, Graubard B, Swanson CA, Schairer C, Kahle LL. Recall of body weight and body size estimation in women enrolled in the breast cancer detection and demonstration project (BCDDP). *Int J Obes Relat Metab Disord.* 1996;20(9):854-859.
248. Murphy G, Snetselaar L, Myers E, LaForge B, Qualls LG, Hand RK, Blackwelder S, et al. Self-reported health parameters compared with clinician measurements: methods in practice-based research. *J Public Health Manag Pract.* 2014;20(5):513-522.
249. Murray CL, Walsh GW, Connor Gorber S. A comparison between Atlantic Canadian and national correction equations to improve the accuracy of self-reported obesity estimates in Atlantic Canada. *J Obes.* 2012;2012:492410.
250. Must A, Willett WC, Dietz WH. Remote recall of childhood height, weight, and body build by elderly subjects. *Am J Epidemiol.* 1993;138(1):56-64.
251. Nakamura K, Hoshino Y, Kodama K, Yamamoto M. Reliability of self-reported body height and weight of adult Japanese women. *J Biosoc Sci.* 1999;31(4):555-558.
252. Natamba BK, Sanchez SE, Gelaye B, Williams MA. Concordance between self-reported pre-pregnancy body mass index (BMI) and BMI measured at the first prenatal study contact. *BMC Pregnancy Childbirth.* 2016;16(1):187.
253. Nawaz H, Chan W, Abdulrahman M, Larson D, Katz DL. Self-reported weight and height: implications for obesity research. *Am J Prev Med.* 2001;20(4):294-298.
254. Neermark S, Holst C, Bisgaard T, Bay-Nielsen M, Becker U, Tolstrup JS. Validation and calibration of self-reported height and weight in the Danish Health Examination Survey. *Eur J Public Health.* 2018.
255. Ng SP, Korda R, Clements M, Latz I, Bauman A, Bambrick H, Liu B, et al. Validity of self-reported height and weight and derived body mass index in middle-aged and elderly individuals in Australia. *Aust N Z J Public Health.* 2011;35(6):557-563.

256. Ng CD. Biases in self-reported height and weight measurements and their effects on modeling health outcomes. *SSM Popul Health*. 2019;7:100405.
257. Niedhammer I, Bugel I, Bonenfant S, Goldberg M, Leclerc A. Validity of self-reported weight and height in the French GAZEL cohort. *Int J Obes Relat Metab Disord*. 2000;24(9):1111-1118.
258. Niedzwiedzka E, Dlugosz A, Wadolowska L. Validity of self-reported height and weight in elderly Poles. *Nutr Res Pract*. 2015;9(3):319-327.
259. Nieto-Garcia FJ, Bush TL, Keyl PM. Body mass definitions of obesity: sensitivity and specificity using self-reported weight and height. *Epidemiology*. 1990;1(2):146-152.
260. Nikolaou CK, Hankey CR, Lean ME. Weight changes in young adults: a mixed-methods study. *Int J Obes (Lond)*. 2015;39(3):508-513.
261. Nikolaou CK, Hankey CR, Lean MEJ. Accuracy of on-line self-reported weights and heights by young adults. *Eur J Public Health*. 2017;27(5):898-903.
262. Norgan NG, Cameron N. The accuracy of body weight and height recall in middle-aged men. *Int J Obes Relat Metab Disord*. 2000;24(12):1695-1698.
263. Nyholm M, Gullberg B, Rastam L, Lindblad U. What is the accurate prevalence of obesity in Sweden in the 21st century? Methodological experiences from the skaraborg project. *Obesity (Silver Spring)*. 2008;16(4):896-898.
264. Nyholm M, Gullberg B, Merlo J, Lundqvist-Persson C, Rastam L, Lindblad U. The validity of obesity based on self-reported weight and height: Implications for population studies. *Obesity (Silver Spring)*. 2007;15(1):197-208.
265. O'Connell KJ, Osborne LM, Westhoff C. Measured and reported weight change for women using a vaginal contraceptive ring vs. a low-dose oral contraceptive. *Contraception*. 2005;72(5):323-327.
266. Ohlmer R, Jacobi C, Fittig E. Diagnosing underweight in adolescent girls: should we rely on self-reported height and weight? *Eat Behav*. 2012;13(1):1-4.
267. Okamoto N, Hosono A, Shibata K, Tsujimura S, Oka K, Fujita H, Kamiya M, et al. Accuracy of self-reported height, weight and waist circumference in a Japanese sample. *Obes Sci Pract*. 2017;3(4):417-424.
268. Okosun IS, Bhatt DV, Boltri JM, Ndirangu M. Self-reported and measured height and weight: impact on racial/ethnic differences in hypertension. *Ethn Dis*. 2008;18(4):415-420.
269. Olfert MD, Barr ML, Charlier CM, Famodu OA, Zhou W, Mathews AE, Byrd-Bredbenner C, et al. Self-Reported vs. Measured Height, Weight, and BMI in Young Adults. *Int J Environ Res Public Health*. 2018;15(10).
270. Olivarius NF, Andreasen AH, Loken J. Accuracy of 1-, 5- and 10-year body weight recall given in a standard questionnaire. *Int J Obes Relat Metab Disord*. 1997;21(1):67-71.
271. Oliveira A, Ramos E, Lopes C, Barros H. Self-reporting weight and height: misclassification effect on the risk estimates for acute myocardial infarction. *Eur J Public Health*. 2009;19(5):548-553.
272. Opichka K, Smith C. Accuracy of self-reported heights and weights in a predominately low-income, diverse population living in the USA. *Am J Hum Biol*. 2018.
273. Ortiz-Panozo E, Yunes-Diaz E, Lajous M, Romieu I, Monge A, Lopez-Ridaura R. Validity of self-reported anthropometry in adult Mexican women. *Salud Publica Mex*. 2017;59(3):266-275.
274. Ossiander EM, Emanuel I, O'Brien W, Malone K. Driver's licenses as a source of data on height and weight. *Econ Hum Biol*. 2004;2(2):219-227.
275. Oud L. Reporting the methodology of height and weight acquisition in studies of body mass index-based prognosis in critically ill patients. *J Crit Care*. 2013;28(5):640-646.
276. Paez KA, Griffey SJ, Thompson J, Gillman MW. Validation of self-reported weights and heights in the avoiding diabetes after pregnancy trial (ADAPT). *BMC Med Res Methodol*. 2014;14:65.



277. Page RM, Lee CM, Miao NF. Assessing prevalence of overweight and obesity through self-reports of height and weight by high school students in Taipei, Taiwan. *J Sch Health*. 2004;74(10):401-407.
278. Paradis AM, Perusse L, Godin G, Vohl MC. Validity of a self-reported measure of familial history of obesity. *Nutr J*. 2008;7:27.
279. Park JY, Mitrou PN, Keogh RH, Luben RN, Wareham NJ, Khaw KT. Self-reported and measured anthropometric data and risk of colorectal cancer in the EPIC-Norfolk study. *Int J Obes(Lond)*. 2012;36(1):107-118.
280. Park JY, Mitrou PN, Keogh RH, Luben RN, Wareham NJ, Khaw KT. Effects of body size and sociodemographic characteristics on differences between self-reported and measured anthropometric data in middle-aged men and women: the EPIC-Norfolk study. *Eur J Clin Nutr*. 2011;65(3):357-367.
281. Patalich M, Lee AH, Burke L, Jancey J, Howat P. Accuracy of self-reported anthropometric measures in older Australian adults. *Australas J Ageing*. 2014;33(3):E27-32.
282. Payette H, Kergoat MJ, Shatenstein B, Boutier V, Nadon S. Validity of self-reported height and weight estimates in cognitively-intact and impaired elderly individuals. *J Nutr Health Aging*. 2000;4(4):223-228.
283. Perez A, Gabriel K, Nehme EK, Mandell DJ, Hoelscher DM. Measuring the bias, precision, accuracy, and validity of self-reported height and weight in assessing overweight and obesity status among adolescents using a surveillance system. *Int J Behav Nutr Phys Act*. 2015;12 Suppl 1:S2.
284. Perez-Cueto FJ, Verbeke W. Reliability and validity of self-reported weight and height in Belgium. *Nutr Hosp*. 2009;24(3):366-367.
285. Perry GS, Byers TE, Mokdad AH, Serdula MK, Williamson DF. The validity of self-reports of past body weights by U.S. adults. *Epidemiology*. 1995;6(1):61-66.
286. Pfohl B, Coryell W, Stangl D, Zimmerman M. Body weight and reported versus measured weight loss as confounders of the dexamethasone suppression test. *Biol Psychiatry*. 1986;21(10):931-938.
287. Phimphasone-Brady P, Dorflinger LM, Ruser C, Bullock A, Godfrey KM, Hernandez D, Min KM, et al. Self-report versus objective measurement of weight history: implications for pre-treatment weight gain. *J Behav Med*. 2019.
288. Ploubidis GB, Grundy E. Health measurement in population surveys: combining information from self-reported and observer-measured health indicators. *Demography*. 2011;48(2):699-724.
289. Poston WS, Jitnarin N, Haddock CK, Jahnke SA, Day RS. Accuracy of self-reported weight, height and BMI in US firefighters. *Occup Med (Lond)*. 2014;64(4):246-254.
290. Powell-Young YM. The validity of self-report weight and height as a surrogate method for direct measurement. *Appl Nurs Res*. 2012;25(1):25-30.
291. Power RF, Power B, O'Gorman CS. A Comparison of Perceived and Measured Paternal Weight and BMI, and Relationship to Weight and BMI of his Children. *Ir Med J*. 2018;111(2):686.
292. Preston SH, Fishman E, Stokes A. Effects of categorization and self-report bias on estimates of the association between obesity and mortality. *Ann Epidemiol*. 2015;25(12):907-911 e901-902.
293. Pronk NP, Crain AL, Vanwormer JJ, Martinson BC, Boucher JL, Cosentino DL. The Use of Telehealth Technology in Assessing the Accuracy of Self-Reported Weight and the Impact of a Daily Immediate-Feedback Intervention among Obese Employees. *Int J Telemed Appl*. 2011;2011:909248.
294. Puig MS, Tur JA, Prieto RM, Benito E. Self-reported and measured overweight and weight-control practices of adolescents living in a Mediterranean city of Spain. *Appetite*. 1996;26(3):301.
295. Pursey K, Burrows TL, Stanwell P, Collins CE. How accurate is web-based self-reported height, weight, and body mass index in young adults? *J Med Internet Res*. 2014;16(1):e4.
296. Qin B, Llanos AAM, Lin Y, Szamreta EA, Plascak JJ, Oh H, Pawlish K, et al. Validity of self-reported weight, height, and body mass index among African American breast cancer survivors. *J Cancer Surviv*. 2018;12(4):460-468.

297. Quick V, Byrd-Bredbenner C, Shoff S, White AA, Lohse B, Horacek T, Kattelman K, et al. Concordance of self-report and measured height and weight of college students. *J Nutr Educ Behav.* 2015;47(1):94-98.
298. Ramos E, Lopes C, Oliveira A, Barros H. Unawareness of weight and height--the effect on self-reported prevalence of overweight in a population-based study. *J Nutr Health Aging.* 2009;13(4):310-314.
299. Rasmussen F, Eriksson M, Nordquist T. Bias in height and weight reported by Swedish adolescents and relations to body dissatisfaction: the COMPASS study. *Eur J Clin Nutr.* 2007;61(7):870-876.
300. Rasmussen M, Holstein BE, Melkevik O, Damsgaard MT. Validity of self-reported height and weight among adolescents: the importance of reporting capability. *BMC Med Res Methodol.* 2013;13:85.
301. Reidlinger DP, Willis JM, Whelan K. Resting metabolic rate and anthropometry in older people: a comparison of measured and calculated values. *J Hum Nutr Diet.* 2015;28(1):72-84.
302. Reidpath DD, Cheah JC, Lam FC, Yasin S, Soyiri I, Allotey P. Validity of self-measured waist and hip circumferences: results from a community study in Malaysia. *Nutr J.* 2013;12:135.
303. Rhew IC, Richardson LP, Lymp J, McTiernan A, McCauley E, Stoep AV. Measurement matters in the association between early adolescent depressive symptoms and body mass index. *Gen Hosp Psychiatry.* 2008;30(5):458-466.
304. Richmond TK, Thurston I, Sonnevile K, Milliren CE, Walls CE, Austin SB. Racial/ethnic differences in accuracy of body mass index reporting in a diverse cohort of young adults. *Int J Obes (Lond).* 2015;39(3):546-548.
305. Richmond TK, Walls CE, Austin SB. Sexual orientation and bias in self-reported BMI. *Obesity (Silver Spring).* 2012;20(8):1703-1709.
306. Rimm EB, Stampfer MJ, Colditz GA, Chute CG, Litin LB, Willett WC. Validity of self-reported waist and hip circumferences in men and women. *Epidemiology.* 1990;1(6):466-473.
307. Roberts RJ. Can self-reported data accurately describe the prevalence of overweight? *Public Health.* 1995;109(4):275-284.
308. Rona RJ, Chinn S, Manning R. The validity of reported parental height in inner city areas in England. *Ann Hum Biol.* 1989;16(1):41-44.
309. Rosella LC, Corey P, Stukel TA, Mustard C, Hux J, Manuel DG. The influence of measurement error on calibration, discrimination, and overall estimation of a risk prediction model. *Popul Health Metr.* 2012;10(1):20.
310. Rosenman R, Tennekoon V, Hill LG. Measuring bias in self-reported data. *Int J Behav Healthc Res.* 2011;2(4):320-332.
311. Rossouw K, Senekal M, Stander I. The accuracy of self-reported weight by overweight and obese women in an outpatient setting. *Public Health Nutr.* 2001;4(1):19-26.
312. Roth LW, Allshouse AA, Lesh J, Polotsky AJ, Santoro N. The correlation between self-reported and measured height, weight, and BMI in reproductive age women. *Maturitas.* 2013;76(2):185-188.
313. Rousseau MC, Parent ME, Siemiatycki J. Comparison of self-reported height and weight by cancer type among men from Montreal, Canada. *Eur J Cancer Prev.* 2005;14(5):431-438.
314. Rowland ML. Self-reported weight and height. *Am J Clin Nutr.* 1990;52(6):1125-1133.
315. Sagna ML, Schopflocher D, Raine K, Nykiforuk C, Plotnikoff R. Adjusting divergences between self-reported and measured height and weight in an adult Canadian population. *Am J Health Behav.* 2013;37(6):841-850.
316. Sahyoun NR, Maynard LM, Zhang XL, Serdula MK. Factors associated with errors in self-reported height and weight in older adults. *J Nutr Health Aging.* 2008;12(2):108-115.

317. Santillan AA, Camargo CA. Body mass index and asthma among Mexican adults: the effect of using self-reported vs measured weight and height. *Int J Obes Relat Metab Disord*. 2003;27(11):1430-1433.
318. Sayegh RA. Self-reported height in postmenopausal women: precise is nice, and sometimes necessary. *Menopause*. 2017;24(5):473-474.
319. Schenker N, Raghunathan TE, Bondarenko I. Improving on analyses of self-reported data in a large-scale health survey by using information from an examination-based survey. *Stat Med*. 2010;29(5):533-545.
320. Schieve LA, Perry GS, Cogswell ME, Scanion KS, Rosenberg D, Carmichael S, Ferre C. Validity of self-reported pregnancy delivery weight: an analysis of the 1988 National Maternal and Infant Health Survey. NMIHS Collaborative Working Group. *Am J Epidemiol*. 1999;150(9):947-956.
321. Schmidt MI, Duncan BB, Tavares M, Polanczyk CA, Pellanda L, Zimmer PM. Validity of self-reported weight--a study of urban Brazilian adults. *Rev Saude Publica*. 1993;27(4):271-276.
322. Scribani M, Shelton J, Chapel D, Krupa N, Wyckoff L, Jenkins P. Comparison of bias resulting from two methods of self-reporting height and weight: a validation study. *JRSM Open*. 2014;5(6):2042533313514048.
323. Sgro SL. The validity of self-reported height and weight is questioned. *Am J Public Health*. 1994;84(7):1181-1182.
324. Shapiro JR, Anderson DA. The effects of restraint, gender, and body mass index on the accuracy of self-reported weight. *Int J Eat Disord*. 2003;34(1):177-180.
325. Sharples H, Crutchley PW, Garcia JA, Gray AR, Horwath CC. Agreement between measured and self-reported height, weight and BMI in predominantly European middle-aged New Zealanders: findings from a nationwide 1989 survey. *N Z Med J*. 2012;125(1362):60-69.
326. Shields M, Connor Gorber S, Janssen I, Tremblay MS. Bias in self-reported estimates of obesity in Canadian health surveys: an update on correction equations for adults. *Health Rep*. 2011;22(3):35-45.
327. Shields M, Gorber SC, Tremblay MS. Effects of measurement on obesity and morbidity. *Health Rep*. 2008;19(2):77-84.
328. Shields M, Connor Gorber S, Tremblay MS. Estimates of obesity based on self-report versus direct measures. *Health Rep*. 2008;19(2):61-76.
329. Shiely F, Hayes K, Perry IJ, Kelleher CC. Height and weight bias: the influence of time. *PLoS One*. 2013;8(1):e54386.
330. Shiely F, Perry IJ, Lutomski J, Harrington J, Kelleher CC, McGee H, Hayes K. Temporal trends in misclassification patterns of measured and self-report based body mass index categories--findings from three population surveys in Ireland. *BMC Public Health*. 2010;10:560.
331. Shin D, Chung H, Weatherspoon L, Song WO. Validity of prepregnancy weight status estimated from self-reported height and weight. *Matern Child Health J*. 2014;18(7):1667-1674.
332. Skeie G, Mode N, Henningsen M, Borch KB. Validity of self-reported body mass index among middle-aged participants in the Norwegian Women and Cancer study. *Clin Epidemiol*. 2015;7:313-323.
333. Skorska MN, Bogaert AF. Sexual Orientation, Objective Height, and Self-Reported Height. *J Sex Res*. 2017;54(1):19-32.
334. Smith GT, Hohlstein LA, Atlas JG. Accuracy of self-reported weight: covariation with binger or restrainer status and eating disorder symptomatology. *Addict Behav*. 1992;17(1):1-8.
335. Spencer EA, Appleby PN, Davey GK, Key TJ. Validity of self-reported height and weight in 4808 EPIC-Oxford participants. *Public Health Nutr*. 2002;5(4):561-565.
336. Stevens J, Keil JE, Waid LR, Gazes PC. Accuracy of current, 4-year, and 28-year self-reported body weight in an elderly population. *Am J Epidemiol*. 1990;132(6):1156-1163.
337. Stewart AW, Jackson RT, Ford MA, Beaglehole R. Underestimation of relative weight by use of self-reported height and weight. *Am J Epidemiol*. 1987;125(1):122-126.

338. Stommel M, Osier N. Temporal changes in bias of body mass index scores based on self-reported height and weight. *Int J Obes (Lond)*. 2013;37(3):461-467.
339. Stommel M, Schoenborn CA. Accuracy and usefulness of BMI measures based on self-reported weight and height: findings from the NHANES & NHIS 2001-2006. *BMC Public Health*. 2009;9:421.
340. Strauss RS. Comparison of measured and self-reported weight and height in a cross-sectional sample of young adolescents. *Int J Obes Relat Metab Disord*. 1999;23(8):904-908.
341. Sullivan R, Johnson WD, Katzmarzyk PT. Waist circumference is an independent correlate of errors in self-reported BMI. *Obesity (Silver Spring)*. 2010;18(11):2237-2239.
342. Sutcliffe CG, Schultz K, Brannock JM, Giardiello FM, Platz EA. Do people know whether they are overweight? Concordance of self-reported, interviewer-observed, and measured body size. *Cancer Causes Control*. 2015;26(1):91-98.
343. Sutin AR. Optimism, pessimism and bias in self-reported body weight among older adults. *Obesity (Silver Spring)*. 2013;21(9):E508-511.
344. Swenne I, Belfrage E, Thurfjell B, Engstrom I. Accuracy of reported weight and menstrual status in teenage girls with eating disorders. *Int J Eat Disord*. 2005;38(4):375-379.
345. Tamakoshi K, Yatsuya H, Kondo T, Hirano T, Hori Y, Yoshida T, Toyoshima H. The accuracy of long-term recall of past body weight in Japanese adult men. *Int J Obes Relat Metab Disord*. 2003;27(2):247-252.
346. Tang W, Aggarwal A, Moudon AV, Drewnowski A. Self-reported and measured weights and heights among adults in Seattle and King County. *BMC Obes*. 2016;3:11.
347. Taylor AW, Dal Grande E, Gill TK, Chittleborough CR, Wilson DH, Adams RJ, Grant JF, et al. How valid are self-reported height and weight? A comparison between CATI self-report and clinic measurements using a large cohort study. *Aust N Z J Public Health*. 2006;30(3):238-246.
348. Tehard B, van Liere MJ, Com Nougue C, Clavel-Chapelon F. Anthropometric measurements and body silhouette of women: validity and perception. *J Am Diet Assoc*. 2002;102(12):1779-1784.
349. Teitelbaum JE, Koreen S, Hightower K, Rajaraman R, Jaeger J. Inaccuracy of stated versus measured parental heights. *Clin Pediatr (Phila)*. 2005;44(4):339-341.
350. Tell GS, Jeffery RW, Kramer FM, Snell MK. Can self-reported body weight be used to evaluate long-term follow-up of a weight-loss program? *J Am Diet Assoc*. 1987;87(9):1198-1201.
351. Thomas J, 3rd, Paulet M, Rajpura JR. Consistency between Self-Reported and Recorded Values for Clinical Measures. *Cardiol Res Pract*. 2016;2016:4364761.
352. Tienboon P, Wahlqvist ML, Rutishauser IH. Self-reported weight and height in adolescents and their parents. *J Adolesc Health*. 1992;13(6):528-532.
353. Toft-Petersen AP, Wulff J, Harrison DA, Ostermann M, Margaron M, Rowan KM, Dawson D. Exploring the impact of using measured or estimated values for height and weight on the relationship between BMI and acute hospital mortality. *J Crit Care*. 2018;44:196-202.
354. Tokmakidis SP, Christodoulos AD, Mantzouranis NI. Validity of self-reported anthropometric values used to assess body mass index and estimate obesity in Greek school children. *J Adolesc Health*. 2007;40(4):305-310.
355. Tolonen H, Koponen P, Mindell JS, Mannisto S, Giampaoli S, Dias CM, Tuovinen T, et al. Underestimation of obesity, hypertension and high cholesterol by self-reported data: Comparison of self-reported information and objective measures from health examination surveys. *Eur J Public Health*. 2014;24(6):941-948.
356. Torres-McGehee TM, Green JM, Leeper JD, Leaver-Dunn D, Richardson M, Bishop PA. Body image, anthropometric measures, and eating-disorder prevalence in auxiliary unit members. *J Athl Train*. 2009;44(4):418-426.
357. Troy LM, Hunter DJ, Manson JE, Colditz GA, Stampfer MJ, Willett WC. The validity of recalled weight among younger women. *Int J Obes Relat Metab Disord*. 1995;19(8):570-572.

358. Tsai EW, Perng W, Mora-Plazas M, Marin C, Baylin A, Villamor E. Accuracy of self-reported weight and height in women from Bogota, Colombia. *Ann Hum Biol.* 2014;41(5):473-476.
359. Tsigilis N. Can secondary school students' self-reported measures of height and weight be trusted? An effect size approach. *Eur J Public Health.* 2006;16(5):532-535.
360. Tsuruda KM, Sagstad S, Sebuodegard S, Hofvind S. Validity and reliability of self-reported health indicators among women attending organized mammographic screening. *Scand J Public Health.* 2018:1403494817749393.
361. Vailas LI, Nitzke SA. Self-reported versus measured weight and height in an older adult meal program population. *J Gerontol A Biol Sci Med Sci.* 1998;53(6):M481-483.
362. van der Voort DJ, Brandon S, Dinant GJ, van Wersch JW. Screening for osteoporosis using easily obtainable biometrical data: diagnostic accuracy of measured, self-reported and recalled BMI, and related costs of bone mineral density measurements. *Osteoporos Int.* 2000;11(3):233-239.
363. Van Eenwyk J, Bensley L, Ossiander EM, Krueger K. Comparison of examination-based and self-reported risk factors for cardiovascular disease, Washington State, 2006-2007. *Prev Chronic Dis.* 2012;9:E117.
364. van Valkengoed IG, Nicolaou M, Stronks K. Ethnic differences in discrepancies between self-reported and measured weight, height and body mass index. *Eur J Public Health.* 2011;21(4):420-423.
365. Vartanian LR, Germeroth LJ. Accuracy in estimating the body weight of self and others: Impact of dietary restraint and BMI. *Body Image.* 2011;8(4):415-418.
366. Vartanian LR, Herman CP, Polivy J. Accuracy in the estimation of body weight: an alternate test of the motivated-distortion hypothesis. *Int J Eat Disord.* 2004;36(1):69-75.
367. Villanueva EV. The validity of self-reported weight in US adults: a population based cross-sectional study. *BMC Public Health.* 2001;1:11.
368. Villarini M, Acito M, Gianfredi V, Berrino F, Gargano G, Somaini M, Nucci D, et al. Validation of Self-Reported Anthropometric Measures and Body Mass Index in a Subcohort of the DianaWeb Population Study. *Clin Breast Cancer.* 2019.
369. Visscher TL, Viet AL, Kroesbergen IH, Seidell JC. Underreporting of BMI in adults and its effect on obesity prevalence estimations in the period 1998 to 2001. *Obesity (Silver Spring).* 2006;14(11):2054-2063.
370. Vuksanović M, Safer A, Palm F, Stieglbauer G, Grau A, Becher H. Validity of self-reported BMI in older adults and an adjustment model. *J Public Health.* 2014;22(3):257-263.
371. Wada K, Tamakoshi K, Tsunekawa T, Otsuka R, Zhang H, Murata C, Nagasawa N, et al. Validity of self-reported height and weight in a Japanese workplace population. *Int J Obes (Lond).* 2005;29(9):1093-1099.
372. Wagaw F, Okoro CA, Kim S, Park J, Rachman F. Linking Data From Health Surveys and Electronic Health Records: A Demonstration Project in Two Chicago Health Center Clinics. *Prev Chronic Dis.* 2018;15:E09.
373. Wang DY, Fentiman IS. Height and breast cancer risk--the bias of self-reported versus measured results. Comments on height and breast cancer risk, Tavani et al., *Eur J Cancer* 1998, 34, 543-547. *Eur J Cancer.* 1999;35(1):162-163.
374. Wang Z, Patterson CM, Hills AP. A comparison of self-reported and measured height, weight and BMI in Australian adolescents. *Aust N Z J Public Health.* 2002;26(5):473-478.
375. Weaver TW, Kushi LH, McGovern PG, Potter JD, Rich SS, King RA, Whitbeck J, et al. Validation study of self-reported measures of fat distribution. *Int J Obes Relat Metab Disord.* 1996;20(7):644-650.
376. Wen M, Kowaleski-Jones L. Sex and ethnic differences in validity of self-reported adult height, weight and body mass index. *Ethn Dis.* 2012;22(1):72-78.
377. White MA, Masheb RM, Grilo CM. Accuracy of self-reported weight and height in binge eating disorder: misreport is not related to psychological factors. *Obesity (Silver Spring).* 2010;18(6):1266-1269.

378. White MA, Masheb RM, Burke-Martindale C, Rothschild B, Grilo CM. Accuracy of self-reported weight among bariatric surgery candidates: the influence of race and weight cycling. *Obesity (Silver Spring)*. 2007;15(11):2761-2768.
379. Willey P, Falsetti T. Inaccuracy of height information on driver's licenses. *J Forensic Sci*. 1991;36(3):813-819.
380. Wise LA, Palmer JR, Spiegelman D, Harlow BL, Stewart EA, Adams-Campbell LL, Rosenberg L. Influence of body size and body fat distribution on risk of uterine leiomyomata in U.S. black women. *Epidemiology*. 2005;16(3):346-354.
381. Wolfe BE, Kelly-Weeder S, Malcom AW, McKenry M. Accuracy of self-reported body weight and height in remitted anorexia nervosa. *J Am Psychiatr Nurses Assoc*. 2013;19(2):66-70.
382. Wright FL, Green J, Reeves G, Beral V, Cairns BJ. Validity over time of self-reported anthropometric variables during follow-up of a large cohort of UK women. *BMC Med Res Methodol*. 2015;15(1):81.
383. Xie YJ, Ho SC, Liu ZM, Hui SS. Comparisons of measured and self-reported anthropometric variables and blood pressure in a sample of Hong Kong female nurses. *PLoS One*. 2014;9(9):e107233.
384. Yannakoulia M, Panagiotakos DB, Pitsavos C, Stefanadis C. Correlates of BMI misreporting among apparently healthy individuals: the ATTICA study. *Obesity (Silver Spring)*. 2006;14(5):894-901.
385. Yong V, Saito Y. How accurate are self-reported height, weight, and BMI among community-dwelling elderly Japanese?: Evidence from a national population-based study. *Geriatrics & gerontology international*. 2012;12(2):247-256.
386. Yoon K, Jang SN, Chun H, Cho SI. Self-reported anthropometric information cannot vouch for the accurate assessment of obesity prevalence in populations of middle-aged and older Korean individuals. *Arch Gerontol Geriatr*. 2014;59(3):584-592.
387. Yoong SL, Carey ML, D'Este C, Sanson-Fisher RW. Agreement between self-reported and measured weight and height collected in general practice patients: a prospective study. *BMC Med Res Methodol*. 2013;13:38.
388. Yoshitake N, Okuda M, Sasaki S, Kunitsugu I, Hobara T. Validity of self-reported body mass index of Japanese children and adolescents. *Pediatr Int*. 2012;54(3):397-401.
389. Yu SM, Nagey DA. Validity of self-reported pregravid weight. *Ann Epidemiol*. 1992;2(5):715-721.
390. Zhang J, Feldblum PJ, Fortney JA. The validity of self-reported height and weight in perimenopausal women. *Am J Public Health*. 1993;83(7):1052-1053.
391. Zhou EK, Kosir U, Kucukgoncu S, Reutenauer Sullivan EL, Tek C. How accurate are self-reported height and weight in the seriously mentally ill? *Psychiatry Res*. 2017;257:51-55.
392. Zhou X, Dibley MJ, Cheng Y, Ouyang X, Yan H. Validity of self-reported weight, height and resultant body mass index in Chinese adolescents and factors associated with errors in self-reports. *BMC Public Health*. 2010;10:190.
393. Zhu K, McKnight B, Stergachis A, Daling JR, Levine RS. Comparison of self-report data and medical records data: results from a case-control study on prostate cancer. *Int J Epidemiol*. 1999;28(3):409-417.
394. Ziebland S, Thorogood M, Fuller A, Muir J. Desire for the body normal: body image and discrepancies between self reported and measured height and weight in a British population. *J Epidemiol Community Health*. 1996;50(1):105-106.
