# Supplementary material
Source: PubMed Central journal article supplement (PMC7261640)
Supplement: NIHMS1062726-supplement-Supplement_2.pdf [file NIHMS1062726-supplement-Supplement_2.pdf]

## SUPPLEMENT 2

Use and reporting of Bland-Altman analyses in studies of self-reported vs measured weight and height

Katherine M. Flegal

Barry Graubard

John P.A. Ioannidis

Table S2 Characteristics and scores of studies that used Bland-Altman methods

| Reference          | Country     | Sample size | Sample type         | Score | Criteria met* |   |   |   |   |   |  |
|--------------------|-------------|-------------|---------------------|-------|---------------|---|---|---|---|---|--|
|                    |             |             |                     |       | 1             | 2 | 3 | 4 | 5 | 6 |  |
| Aasvee (1)         | Estonia     | 3 379       | Adolescents         | 3     |               | • | • | • |   |   |  |
| Araujo (2)         | Brazil      | 5 882       | Pregnant women      | 1     |               |   | • |   |   |   |  |
| Beghin (3)         | Europe      | 3 865       | Adolescents         | 3     |               | • | • | • |   |   |  |
| Bes-Rastrollo (4)  | US/Canada   | 911         | Adults              | 1     |               |   | • |   |   |   |  |
| Bonn (5)           | Sweden      | 149         | Adults              | 2     |               | • | • |   |   |   |  |
| Brettschneider (6) | Germany     | 3 468       | Adolescents         | 1     |               |   | • |   |   |   |  |
| Burton (7)         | Australia   | 159         | Adult women         | 2     |               | • | • |   |   |   |  |
| Cairns (8)         | UK          | 368         | Adult women         | 2     |               |   | • | • |   |   |  |
| Carvalho (9)       | Brazil      | 299         | Adolescents, adults | 3     | •             | • | • |   |   |   |  |
| Celis-Morales (10) | Europe      | 140         | Adults              | 3     |               | • | • | • |   |   |  |
| Chor (11)          | Brazil      | 322         | Adults              | 2     |               |   |   | • | • |   |  |
| Ciarapica (12)     | Italy       | 271         | Adult women         | 2     |               | • | • |   |   |   |  |
| Cullum (13)        | UK          | 284         | Adults              | 1     |               |   | • |   |   |   |  |
| Cuspidi (14)       | Italy       | 1 963       | Adults              | 2     |               | • | • |   |   |   |  |
| Dahl (15)          | Sweden      | 134         | Adults              | 1     |               |   | • |   |   |   |  |
| De Vriendt(16)     | Belgium     | 982         | Adolescents         | 2     |               | • | • |   |   |   |  |
| Dekkers (17)       | Netherlands | 1 298       | Overweight adults   | 3     |               | • | • | • |   |   |  |
| Drieskens(18)      | Belgium     | 1 213       | Adults              | 3     |               | • | • | • |   |   |  |
| Duran (19)         | Brazil      | 43          | Adult               | 2     |               | • | • |   |   |   |  |
| Ekstrom (20)       | Sweden      | 1 698       | Adolescents         | 3     | •             | • | • |   |   |   |  |
| Elgar (21)         | UK          | 418         | Adolescents         | 2     |               | • | • |   |   |   |  |
| Elgar (22)         | Canada      | 4 615       | Adults              | 3     |               | • | • | • |   |   |  |

| Reference        | Country     | Sample size | Sample type        | Score | Criteria met* |   |   |   |   |   |  |
|------------------|-------------|-------------|--------------------|-------|---------------|---|---|---|---|---|--|
|                  |             |             |                    |       | 1             | 2 | 3 | 4 | 5 | 6 |  |
| Finardi(23)      | Switzerland | 233         | Adults             | 3     |               | • | • | • |   |   |  |
| Fonseca (24)     | Portugal    | 462         | Adolescents        | 3     |               | • | • | • |   |   |  |
| Frid (25)        | Sweden      | 55          | Older adults       | 3     |               | • | • | • |   |   |  |
| Gokler (26)      | Turkey      | 3 918       | Adolescents        | 2     |               | • | • |   |   |   |  |
| Grossschadl (27) | Austria     | 473         | Adults             | 3     |               | • | • | • |   |   |  |
| Gunnell (28)     | UK          | 257         | Adults             | 1     |               |   | • |   |   |   |  |
| Haverkort (29)   | Netherlands | 488         | Adults             | 3     |               | • | • | • |   |   |  |
| Isidoro (30)     | Spain       | 1 951       | Adult women        | 0     |               |   |   |   |   |   |  |
| Jeffs (31)       | New Zealand | 248         | Adult women        | 0     |               |   |   |   |   |   |  |
| Jenkins (32)     | US          | 191         | Female adolescents | 3     |               | • | • | • |   |   |  |
| Jenkins (33)     | US          | 60          | Adolescents        | 0     |               |   |   |   |   |   |  |
| Jerome (34)      | US          | 225         | Adults             | 2     |               | • | • |   |   |   |  |
| Kee (35)         | Malaysia    | 663         | Adolescents        | 3     |               | • | • | • |   |   |  |
| Klag (36)        | US          | 78          | Adults             | 2     |               | • | • |   |   |   |  |
| Kintziou (37)    | Greece      | 93          | Young women        | 2     |               | • | • |   |   |   |  |
| Lassale (38)     | France      | 815         | Adults             | 3     |               | • | • | • |   |   |  |
| Lawlor (39)      | UK          | 1 310       | Older women        | 4     |               | • | • | • | • |   |  |
| Lu (40)          | China       | 5 867       | Adults             | 3     | •             | • | • |   |   |   |  |
| Lucca (41)       | Brazil      | 726         | Adults             | 3     |               | • | • | • |   |   |  |
| Luo (42)         | US          | 75 336      | Adult women        | 1     |               |   | • |   |   |   |  |
| Martins (43)     | Brazil      | 309         | Adults             | 2     |               | • | • |   |   |   |  |
| McAdams (44)     | US          | 10 639      | Adults             | 1     |               |   | • |   |   |   |  |
| Moreira (45)     | Brazil      | 40 366      | Adults             | 1     |               |   |   | • |   |   |  |
| Nakamura (46)    | Japan       | 354         | Adult women        | 2     |               | • | • |   |   |   |  |
| Natamba (47)     | Peru        | 2 605       | Adult women        | 3     |               | • | • | • |   |   |  |
| Neermark (48)    | Denmark     | 15 692      | Adults             | 2     |               | • | • |   |   |   |  |
| Ng (49)          | Australia   | 608         | Adults             | 3     |               | • | • | • |   |   |  |
| Nikolaou (50)    | UK          | 1 278       | Young adults       | 2     |               | • | • |   |   |   |  |
| Okamoto (51)     | Japan       | 7 443       | Adults             | 4     | •             | • | • | • |   |   |  |
| Olivarios (52)   | Denmark     | 84          | Adults             | 2     |               | • | • |   |   |   |  |

| Reference              | Country     | Sample size | Sample type  | Score | Criteria met* |   |   |   |   |   |
|------------------------|-------------|-------------|--------------|-------|---------------|---|---|---|---|---|
|                        |             |             |              |       | 1             | 2 | 3 | 4 | 5 | 6 |
| Ortiz-Panozo (53)      | Mexico      | 3 413       | Adult women  | 1     |               |   | • |   |   |   |
| Paez (54)              | US          | 30          | Adult women  | 3     |               | • | • | • |   |   |
| Pasalich (55)          | Australia   | 103         | Older adults | 3     |               | • | • | • |   |   |
| Phimphasone-Brady (56) | US          | 92          | Adults       | 3     |               | • | • | • |   |   |
| Poston (57)            | US          | 1 001       | Adults       | 1     |               |   | • |   |   |   |
| Powell-Young (58)      | US          | 264         | Adolescents  | 4     |               | • | • | • | • |   |
| Pursesey (59)          | Australia   | 117         | Young adults | 3     |               | • | • | • |   |   |
| Roth (60)              | US          | 60          | Adult women  | 1     |               | • |   |   |   |   |
| Sharples (61)          | New Zealand | 345         | Adults       | 3     |               | • | • | • |   |   |
| Skeie (62)             | Norway      | 280         | Adult women  | 2     |               | • | • |   |   |   |
| Tang (63)              | US          | 419         | Adults       | 3     |               | • | • | • |   |   |
| Taylor (64)            | Australia   | 1 537       | Adults       | 2     |               | • | • |   |   |   |
| Villarini (65)         | Italy       | 200         | Adult women  | 4     |               | • | • | • |   | • |
| Wada (66)              | Japan       | 5 401       | Adults       | 3     |               | • | • | • |   |   |
| Wang (67)              | Australia   | 572         | Adolescents  | 3     |               | • | • | • |   |   |
| Xie (68)               | Hong Kong   | 144         | Adult women  | 3     |               | • | • | • |   |   |
| Yannakoulia (69)       | Greece      | 3 042       | Adults       | 1     |               |   |   | • |   |   |
| Yoong (70)             | Australia   | 332         | Adults       | 3     |               | • | • | • |   |   |
| Yoshitake (71)         | Japan       | 358         | Adolescents  | 3     |               | • |   | • |   | • |
| Zhou (72)              | China       | 1 726       | Adolescents  | 4     |               | • | • | • |   | • |

\* Criteria

- 1: assessment of the normality of the distribution of differences
- 2: a complete and correctly labeled Bland-Altman plot displaying the mean difference and limits of agreement (LOA)
- 3: numerical values and confidence intervals, standard errors or standard deviations for mean difference
- 4: numerical values of LOA
- 5: confidence intervals for LOA;
- 6: pre-specified criteria for acceptable LOA

1. Aasvee K, Rasmussen M, Kelly C, Kurvinen E, Giacchi MV, Ahluwalia N. Validity of self-reported height and weight for estimating prevalence of overweight among Estonian adolescents: the Health Behaviour in School-aged Children study. *BMC Res Notes*. 2015;8:606.
2. Araujo R, Gama S, Barros DC, Saunders C, Mattos IE. Validity of self-reported weight, height, and BMI in mothers of the research Birth in Brazil. *Rev Saude Publica*. 2017;51:115.
3. Beghin L, Huybrechts I, Ortega FB, Coopman S, Manios Y, Wijnhoven TM, Duhamel A, et al. Nutritional and pubertal status influences accuracy of self-reported weight and height in adolescents: the HELENA Study. *Ann Nutr Metab*. 2013;62(3):189-200.
4. Bes-Rastrollo M, Sabate J, Jaceldo-Siegl K, Fraser GE. Validation of self-reported anthropometrics in the Adventist Health Study 2. *BMC public health*. 2011;11:213.
5. Bonn SE, Trolle Lagerros Y, Balter K. How valid are Web-based self-reports of weight? *J Med Internet Res*. 2013;15(4):e52.
6. Brettschneider AK, Rosario AS, Ellert U. Validity and predictors of BMI derived from self-reported height and weight among 11- to 17-year-old German adolescents from the KiGGS study. *BMC Res Notes*. 2011;4:414.
7. Burton NW, Brown W, Dobson A. Accuracy of body mass index estimated from self-reported height and weight in mid-aged Australian women. *Aust N Z J Public Health*. 2010;34(6):620-623.
8. Cairns BJ, Liu B, Clennell S, Cooper R, Reeves GK, Beral V, Kuh D. Lifetime body size and reproductive factors: comparisons of data recorded prospectively with self reports in middle age. *BMC Med Res Methodol*. 2011;11(1):7.
9. Carvalho AM, Piovezan LG, Selem SS, Fisberg RM, Marchioni DM. Validation and calibration of self-reported weight and height from individuals in the city of Sao Paulo. *Rev Bras Epidemiol*. 2014;17(3):735-746.
10. Celis-Morales C, Livingstone KM, Woolhead C, Forster H, O'Donovan CB, Macready AL, Fallaize R, et al. How reliable is internet-based self-reported identity, socio-demographic and obesity measures in European adults? *Genes & nutrition*. 2015;10(5):28.
11. Chor D, Coutinho Eda S, Laurenti R. Reliability of self-reported weight and height among state bank employees. *Rev Saude Publica*. 1999;33(1):16-23.
12. Ciarapica D, Mauro B, Zaccaria M, Cannella C, Polito A. Validity of self-reported body weight and height among women including patients with eating disorders. *Eat Weight Disord*. 2010;15(1-2):e74-80.
13. Cullum A, McCarthy A, Gunnell D, Davey SG, Sterne JA, Ben-Shlomo Y. Dietary restraint and the mis-reporting of anthropometric measures by middle-aged adults. *Int J Obes Relat Metab Disord*. 2004;28(3):426-433.
14. Cuspidi C, Negri F, Giudici V, Muiesan ML, Grandi AM, Ganau A, Lonati L, et al. Self-reported weight and height: implications for left ventricular hypertrophy detection. An Italian multi-center study. *Clin Exp Hypertens*. 2011;33(3):192-201.
15. Dahl AK, Reynolds CA. Accuracy of recalled body weight--a study with 20-years of follow-up. *Obesity (Silver Spring)*. 2013;21(6):1293-1298.
16. De Vriendt T, Huybrechts I, Ottevaere C, Van Trimont I, De Henauw S. Validity of self-reported weight and height of adolescents, its impact on classification into BMI-categories and the association with weighing behaviour. *Int J Environ Res Public Health*. 2009;6(10):2696-2711.
17. Dekkers JC, van Wier MF, Hendriksen IJ, Twisk JW, van Mechelen W. Accuracy of self-reported body weight, height and waist circumference in a Dutch overweight working population. *BMC Med Res Methodol*. 2008;8:69.
18. Drieskens S, Demarest S, Bel S, De Ridder K, Tafforeau J. Correction of self-reported BMI based on objective measurements: a Belgian experience. *Arch Public Health*. 2018;76:10.
19. Duran AC, Florindo AA, Jaime PC. Can self-reported height and weight be used among people living with HIV/AIDS? *Int J STD AIDS*. 2012;23(4):e1-6.

20. Ekstrom S, Kull I, Nilsson S, Bergstrom A. Web-based self-reported height, weight, and body mass index among Swedish adolescents: a validation study. *J Med Internet Res*. 2015;17(3):e73.
21. Elgar FJ, Roberts C, Tudor-Smith C, Moore L. Validity of self-reported height and weight and predictors of bias in adolescents. *J Adolesc Health*. 2005;37(5):371-375.
22. Elgar FJ, Stewart JM. Validity of self-report screening for overweight and obesity. Evidence from the Canadian Community Health Survey. *Can J Public Health*. 2008;99(5):423-427.
23. Finardi P, Nickel CH, Koller MT, Bingisser R. Accuracy of self-reported weight in a high risk geriatric population in the emergency department. *Swiss Med Wkly*. 2012;142:w13585.
24. Fonseca H, Silva AM, Matos MG, Esteves I, Costa P, Guerra A, Gomes-Pedro J. Validity of BMI based on self-reported weight and height in adolescents. *Acta Paediatr*. 2010;99(1):83-88.
25. Frid H, Adolfsen ET, Rosenblad A, Nydahl M. Agreement between different methods of measuring height in elderly patients. *J Hum Nutr Diet*. 2013;26(5):504-511.
26. Gokler ME, Bugrul N, Sari AO, Metintas S. The validity of self-reported vs. measured body weight and height and the effect of self-perception. *Arch Med Sci*. 2018;14(1):174-181.
27. Grossschadl F, Haditsch B, Stronegger WJ. Validity of self-reported weight and height in Austrian adults: sociodemographic determinants and consequences for the classification of BMI categories. *Public Health Nutr*. 2012;15(1):20-27.
28. Gunnell D, Berney L, Holland P, Maynard M, Blane D, Frankel S, Smith GD. How accurately are height, weight and leg length reported by the elderly, and how closely are they related to measurements recorded in childhood? *Int J Epidemiol*. 2000;29(3):456-464.
29. Haverkort EB, de Haan RJ, Binnekade JM, van Bokhorst-de van der Schueren MA. Self-reporting of height and weight: valid and reliable identification of malnutrition in preoperative patients. *Am J Surg*. 2012;203(6):700-707.
30. Isidoro B, Lope V, Pedraz-Pingarron C, Collado-Garcia F, Santamarina C, Moreo P, Vidal C, et al. Validation of obesity based on self-reported data in Spanish women participants in breast cancer screening programmes. *BMC public health*. 2011;11:960.
31. Jeffs E, Sharp B, Gullam J, Paterson H. Weight and height measurement: potential impact in obstetric care. *N Z Med J*. 2014;127(1392):17-26.
32. Jenkins TM, Buncher CR, Akers R, Daniels SR, Lawson ML, Khoury PR, Wilson TP, et al. Validation of a weight history questionnaire to identify adolescent obesity. *Obes Surg*. 2013;23(9):1404-1412.
33. Jenkins TM, Boyce TW, Ralph Buncher C, Zeller MH, Courcoulas AP, Evans M, Inge TH. Accuracy of Self-Reported Weight Among Adolescent and Young Adults Following Bariatric Surgery. *Obes Surg*. 2017;27(6):1529-1532.
34. Jerome GJ, Dalcin A, Coughlin JW, Fitzpatrick S, Wang NY, Durkin N, Yeh HC, et al. Longitudinal accuracy of web-based self-reported weights: results from the Hopkins POWER Trial. *J Med Internet Res*. 2014;16(7):e173.
35. Kee CC, Lim KH, Sumarni MG, Teh CH, Chan YY, Nuur Hafizah MI, Cheah YK, et al. Validity of self-reported weight and height: a cross-sectional study among Malaysian adolescents. *BMC Med Res Methodol*. 2017;17(1):85.
36. Klag MJ, He J, Mead LA, Ford DE, Pearson TA, Levine DM. Validity of physicians' self-reports of cardiovascular disease risk factors. *Ann Epidemiol*. 1993;3(4):442-447.
37. Kintziou E, Nikolaidis PT, Kefala V, Rosemann T, Knechtle B. Validity of Self-Reported Body Mass, Height, and Body Mass Index in Female Students: The Role of Physical Activity Level, Menstrual Cycle Phase, and Time of Day. *Int J Environ Res Public Health*. 2019;16(7).
38. Lassale C, Peneau S, Touvier M, Julia C, Galan P, Hercberg S, Kesse-Guyot E. Validity of web-based self-reported weight and height: results of the Nutrinet-Sante study. *J Med Internet Res*. 2013;15(8):e152.

39. Lawlor DA, Bedford C, Taylor M, Ebrahim S. Agreement between measured and self-reported weight in older women. Results from the British Women's Heart and Health Study. *Age Ageing*. 2002;31(3):169-174.
40. Lu S, Su J, Xiang Q, Zhou J, Wu M. Accuracy of self-reported height, weight, and waist circumference in a general adult Chinese population. *Popul Health Metr*. 2016;14:30.
41. Lucca A, Moura EC. Validity and reliability of self-reported weight, height and body mass index from telephone interviews. *Cad Saude Publica*. 2010;26(1):110-122.
42. Luo J, Thomson CA, Hendryx M, Tinker LF, Manson JE, Li Y, Nelson DA, et al. Accuracy of self-reported weight in the Women's Health Initiative. *Public Health Nutr*. 2018:1-10.
43. Martins PC, de Carvalho MB, Machado CJ. Use of self-reported measures of height, weight and body mass index in a rural population of Northeast Brazil. *Rev Bras Epidemiol*. 2015;18(1):137-148.
44. McAdams MA, van Dam RM, Hu FB. Comparison of self-reported and measured BMI as correlates of disease markers in US adults. *Obesity (SilverSpring)*. 2007;15(1):188-196.
45. Moreira NF, Luz VG, Moreira CC, Pereira RA, Sichieri R, Ferreira MG, Muraro AP, et al. Self-reported weight and height are valid measures to determine weight status: results from the Brazilian National Health Survey (PNS 2013). *Cad Saude Publica*. 2018;34(5):e00063917.
46. Nakamura K, Hoshino Y, Kodama K, Yamamoto M. Reliability of self-reported body height and weight of adult Japanese women. *J Biosoc Sci*. 1999;31(4):555-558.
47. Natamba BK, Sanchez SE, Gelaye B, Williams MA. Concordance between self-reported pre-pregnancy body mass index (BMI) and BMI measured at the first prenatal study contact. *BMC Pregnancy Childbirth*. 2016;16(1):187.
48. Neermark S, Holst C, Bisgaard T, Bay-Nielsen M, Becker U, Tolstrup JS. Validation and calibration of self-reported height and weight in the Danish Health Examination Survey. *Eur J Public Health*. 2018.
49. Ng SP, Korda R, Clements M, Latz I, Bauman A, Bambrick H, Liu B, et al. Validity of self-reported height and weight and derived body mass index in middle-aged and elderly individuals in Australia. *Aust N Z J Public Health*. 2011;35(6):557-563.
50. Nikolaou CK, Hankey CR, Lean MEJ. Accuracy of on-line self-reported weights and heights by young adults. *Eur J Public Health*. 2017;27(5):898-903.
51. Okamoto N, Hosono A, Shibata K, Tsujimura S, Oka K, Fujita H, Kamiya M, et al. Accuracy of self-reported height, weight and waist circumference in a Japanese sample. *Obes Sci Pract*. 2017;3(4):417-424.
52. Olivarius NF, Andreasen AH, Loken J. Accuracy of 1-, 5- and 10-year body weight recall given in a standard questionnaire. *Int J Obes Relat Metab Disord*. 1997;21(1):67-71.
53. Ortiz-Panozo E, Yunes-Diaz E, Lajous M, Romieu I, Monge A, Lopez-Ridaura R. Validity of self-reported anthropometry in adult Mexican women. *Salud Publica Mex*. 2017;59(3):266-275.
54. Paez KA, Griffey SJ, Thompson J, Gillman MW. Validation of self-reported weights and heights in the avoiding diabetes after pregnancy trial (ADAPT). *BMC Med Res Methodol*. 2014;14:65.
55. Pasalich M, Lee AH, Burke L, Jancey J, Howat P. Accuracy of self-reported anthropometric measures in older Australian adults. *Australas J Ageing*. 2014;33(3):E27-32.
56. Phimphasone-Brady P, Dorflinger LM, Ruser C, Bullock A, Godfrey KM, Hernandez D, Min KM, et al. Self-report versus objective measurement of weight history: implications for pre-treatment weight gain. *J Behav Med*. 2019.
57. Poston WS, Jitnarin N, Haddock CK, Jahnke SA, Day RS. Accuracy of self-reported weight, height and BMI in US firefighters. *Occup Med (Lond)*. 2014;64(4):246-254.
58. Powell-Young YM. The validity of self-report weight and height as a surrogate method for direct measurement. *Appl Nurs Res*. 2012;25(1):25-30.
59. Pursey K, Burrows TL, Stanwell P, Collins CE. How accurate is web-based self-reported height, weight, and body mass index in young adults? *J Med Internet Res*. 2014;16(1):e4.

60. Roth LW, Allshouse AA, Lesh J, Polotsky AJ, Santoro N. The correlation between self-reported and measured height, weight, and BMI in reproductive age women. *Maturitas*. 2013;76(2):185-188.
61. Sharples H, Crutchley PW, Garcia JA, Gray AR, Horwath CC. Agreement between measured and self-reported height, weight and BMI in predominantly European middle-aged New Zealanders: findings from a nationwide 1989 survey. *N Z Med J*. 2012;125(1362):60-69.
62. Skeie G, Mode N, Henningsen M, Borch KB. Validity of self-reported body mass index among middle-aged participants in the Norwegian Women and Cancer study. *Clin Epidemiol*. 2015;7:313-323.
63. Tang W, Aggarwal A, Moudon AV, Drewnowski A. Self-reported and measured weights and heights among adults in Seattle and King County. *BMC obesity*. 2016;3:11.
64. Taylor AW, Dal Grande E, Gill TK, Chittleborough CR, Wilson DH, Adams RJ, Grant JF, et al. How valid are self-reported height and weight? A comparison between CATI self-report and clinic measurements using a large cohort study. *Aust N Z J Public Health*. 2006;30(3):238-246.
65. Villarini M, Acito M, Gianfredi V, Berrino F, Gargano G, Somaini M, Nucci D, et al. Validation of Self-Reported Anthropometric Measures and Body Mass Index in a Subcohort of the DianaWeb Population Study. *Clin Breast Cancer*. 2019.
66. Wada K, Tamakoshi K, Tsunekawa T, Otsuka R, Zhang H, Murata C, Nagasawa N, et al. Validity of self-reported height and weight in a Japanese workplace population. *Int J Obes (Lond)*. 2005;29(9):1093-1099.
67. Wang Z, Patterson CM, Hills AP. A comparison of self-reported and measured height, weight and BMI in Australian adolescents. *Aust N Z J Public Health*. 2002;26(5):473-478.
68. Xie YJ, Ho SC, Liu ZM, Hui SS. Comparisons of measured and self-reported anthropometric variables and blood pressure in a sample of Hong Kong female nurses. *PLoS One*. 2014;9(9):e107233.
69. Yannakoulia M, Panagiotakos DB, Pitsavos C, Stefanadis C. Correlates of BMI misreporting among apparently healthy individuals: the ATTICA study. *Obesity (Silver Spring)*. 2006;14(5):894-901.
70. Yoong SL, Carey ML, D'Este C, Sanson-Fisher RW. Agreement between self-reported and measured weight and height collected in general practice patients: a prospective study. *BMC Med Res Methodol*. 2013;13:38.
71. Yoshitake N, Okuda M, Sasaki S, Kunitsugu I, Hobara T. Validity of self-reported body mass index of Japanese children and adolescents. *Pediatr Int*. 2012;54(3):397-401.
72. Zhou X, Dibley MJ, Cheng Y, Ouyang X, Yan H. Validity of self-reported weight, height and resultant body mass index in Chinese adolescents and factors associated with errors in self-reports. *BMC public health*. 2010;10:190.
